# Supplementary material for: Comparative Transcriptome Analysis Reveals Heat-Responsive Genes in Chinese Cabbage (Brassica rapa ssp. chinensis)
Source: Front Plant Sci. 2016 Jun 28;7:939. doi: 10.3389/fpls.2016.00939 (PMC4923122; doi:10.3389/fpls.2016.00939)
Supplement: Table S1 — Primers used in the study for quantitative RT-PCR. [file DataSheet1.XLSX]

## Sheet: Sheet1
Table S1 Primers used in the study for quantitative RT-PCR.
Gene	Primer	Sequences (5'-3')
Bra002316	Oxa-F	TCAAAGCCGCTGTGACTCC
	Oxa-R	ATGACGACAAGGACCTCAGATG
Bra038432	CAO-F	TCACAAACGACGAGCAAGAAGC
	CAO-R	CTCCGCCTCACTCTCACCATAC
Bra027596	NAC069-F	GGCTCGTTACCGATGCGATTAG
	NAC069-R	TTGTCGCCTTCTTCGTGGATTC
Bra007144	rpl18-F	CGACGAAGCACAAGACTAAGC
	rpl18-R	GAAGAACTGCGGCGACATC
Bra028816	RGP-F	CATCAACCTGACCTTCACCATC
	RGP-R	CTCCGAAGCGAGAACAAAGC
Bra010895	NAC005-F	GCATCCGGTGGGCTTCAG
	NAC005-R	TCGTCCTTCCTTATCGAACTCG
Bra034104	HSP70-F	GCCCTCCGTGATGACAAGATAG
	HSP70-R	TCTGCTTCAGCCAACTGGTTAC
Bra030036	Hspb27-F	ACTAAGAACATGAGCCGTGAGG
	Hspb27-R	CCTGAGCCAATCGACCAAGAG
Bra010598	CYP81-F	CTCCGCACTCGCAAGAGAATG
	CYP81-R	CCGTAAGGTGTGGTCGCAATG
	BrActin-F	CTCAGTCCAAAAGAGGTATTCT
	BrActin-R	GTAGAATGTGTGATGCCAGATC
