# Supplementary material for: Comparative Transcriptome Analysis Reveals Heat-Responsive Genes in Chinese Cabbage (Brassica rapa ssp. chinensis)
Source: Front Plant Sci. 2016 Jun 28;7:939. doi: 10.3389/fpls.2016.00939 (PMC4923122; doi:10.3389/fpls.2016.00939)
Supplement: Table S2 — Differentially expressed genes between “GHA” and “XK” at different heat treatment stages. [file DataSheet2.XLSX]

## Sheet: Sheet1
Table S2 Differentially expressed genes between 'GHA' and 'XK' at different heat treatment stages.
CK
Gene	GHA_CK	XK_CK	log2(fold_change)	A. thaliana gene	BLASTX annotations
Bra000382	2.3312	0	#NAME?	AT2G45220	pectinesterase family protein
Bra003923	19.3121	0	#NAME?	AT1G71480	nuclear transport factor 2 (NTF2) family protein
Bra003979	5.42262	0	#NAME?	AT1G69870	proton-dependent oligopeptide transport (POT) family protein
Bra008311	3.77038	0	#NAME?	AT1G77510	"ATPDIL1-2, PDI6, ATPDI6; ATPDIL1-2 (PDI-LIKE 1-2); protein disulfide isomerase"
Bra010899	4.1632	0	#NAME?	AT1G28170	sulfotransferase family protein
Bra012353	7.97698	0	#NAME?	AT1G22990	heavy-metal-associated domain-containing protein / copper chaperone (CCH)-related
Bra013478	2.84559	0	#NAME?	AT4G20860	FAD-binding domain-containing protein
Bra014534	133.029	0	#NAME?	AT2G43510	ATTI1; ATTI1; serine-type endopeptidase inhibitor
Bra020140	1.71992	0	#NAME?	AT5G20960	"AAO1, AO1, ATAO, ATAO1; AAO1 (ARABIDOPSIS ALDEHYDE OXIDASE 1); aldehyde oxidase/ indole-3-acetaldehyde oxidase"
Bra022810	12.3835	0	#NAME?	AT2G30630	unknown protein
Bra023915	7.86374	0	#NAME?	AT1G74490	"protein kinase, putative"
Bra024155	3.2924	0	#NAME?	AT4G29210	"GGT3, GGT4; GGT4 (GAMMA-GLUTAMYL TRANSPEPTIDASE 4); gamma-glutamyltransferase/ glutathione gamma-glutamylcysteinyltransferase"
Bra026536	7.67066	0	#NAME?	AT2G03760	"ST, ATST1, RAR047, ST1; ST; brassinosteroid sulfotransferase/ sulfotransferase"
Bra027466	2.7873	0	#NAME?	AT5G42930	triacylglycerol lipase
Bra029874	1.85037	0	#NAME?	AT5G05170	CESA3, IXR1, ATCESA3, ATH-B, CEV1; CEV1 (CONSTITUTIVE EXPRESSION OF VSP 1); cellulose synthase/ transferase, transferring glycosyl groups"
Bra031990	5.9124	0	#NAME?	AT3G03480	CHAT; CHAT (acetyl CoA:(Z)-3-hexen-1-ol acetyltransferase); acetyl CoA:(Z)-3-hexen-1-ol acetyltransferase
Bra036158	4.51665	0	#NAME?	AT5G48850	ATSDI1; ATSDI1 (SULPHUR DEFICIENCY-INDUCED 1); binding
Bra038223	2.95427	0	#NAME?	AT3G19640	magnesium transporter CorA-like family protein (MRS2-3)
Bra038504	1.82872	0	#NAME?	AT4G16730	lyase/ magnesium ion bindin
Bra001086	0	20.6573	inf	AT1G06190	"ATP binding / ATPase, coupled to transmembrane movement of ions, phosphorylative mechanism"
Bra003501	0	2.16168	inf	AT3G62600	ATERDJ3B; ATERDJ3B; heat shock protein binding / unfolded protein binding
Bra005331	0	1.67158	inf	AT2G35540	DNAJ heat shock N-terminal domain-containing protein
Bra006098	0	20.909	inf	AT3G25860	"LTA2, PLE2; LTA2; dihydrolipoyllysine-residue acetyltransferase"
Bra006115	0	756.352	inf
Bra007691	0	37.7424	inf	AT5G18880	"FUNCTIONS IN: molecular_function unknown; INVOLVED IN: biological_process unknown; LOCATED IN: cellular_component unknown; CONTAINS InterPro DOMAIN/s: RNA-directed DNA polymerase (reverse transcriptase), related (InterPro:IPR015706); BEST Arabidopsis thaliana protein match is: unknown protein (TAIR:AT4G04650.1); Has 393 Blast hits to 389 proteins in 16 species: Archae - 0; Bacteria - 0; Metazoa …
Bra008059	0	9.335	inf	AT4G34940	ARO1; ARO1 (ARMADILLO REPEAT ONLY 1); binding
Bra010682	0	3.06611	inf	AT1G07990	SIT4 phosphatase-associated family protein
Bra012422	0	11.7011	inf	AT1G27130	"ATGSTU13, GST12; ATGSTU13 (ARABIDOPSIS THALIANA GLUTATHIONE S-TRANSFERASE TAU 13); glutathione transferase"
Bra015818	0	3.22846	inf	AT5G15690	INVOLVED IN: response to cadmium ion; EXPRESSED IN: cultured cell; BEST Arabidopsis thaliana protein match is: MED21 (MEDIATOR 21) (TAIR:AT4G04780.2); Has 53 Blast hits to 53 proteins in 6 species: Archae - 0; Bacteria - 2; Metazoa - 0; Fungi - 0; Plants - 47; Viruses - 4; Other Eukaryotes - 0 (source: NCBI BLink).
Bra017242	0	4.7081	inf	AT3G13680	F-box family protein
Bra018840	0	1.83615	inf	AT1G64255	SWIM zinc finger family protein
Bra019684	0	6.38208	inf	AT5G59580	UGT76E1; UGT76E1 (UDP-GLUCOSYL TRANSFERASE 76E1); UDP-glycosyltransferase/ quercetin 3-O-glucosyltransferase/ quercetin 7-O-glucosyltransferase
Bra020987	0	6.8513	inf	AT1G17260	"AHA10; AHA10 (Autoinhibited H(+)-ATPase isoform 10); ATPase/ ATPase, coupled to transmembrane movement of ions, phosphorylative mechanism / cation-transporting ATPase"
Bra023787	0	6.35254	inf	AT2G19410	protein kinase family protein
Bra023909	0	7888.01	inf	AT3G21055	PSBTN; PSBTN (photosystem II subunit T)
Bra025530	0	7.18145	inf	AT5G02790	"In2-1 protein, putative"
Bra025684	0	10.1911	inf	AT2G27100	SE; SE (SERRATE); DNA binding / transcription factor
Bra025766	0	6.73228	inf	AT1G19770	ATPUP14; ATPUP14; purine transmembrane transporter
Bra027596	0	11.9456	inf	AT4G01550	anac069; anac069 (Arabidopsis NAC domain containing protein 69); transcription factor
Bra027933	0	2.64682	inf	AT3G48400	DC1 domain-containing protein
Bra028403	0	4.74118	inf	AT5G38280	PR5K; PR5K; kinase/ transmembrane receptor protein serine/threonine kinase
Bra028470	0	7.05916	inf	AT1G44835	YbaK/prolyl-tRNA synthetase family protein
Bra029619	0	6.9896	inf	AT3G51830	"ATG5, SAC8; ATG5; phosphatidylinositol-4,5-bisphosphate 5-phosphatase"
Bra029886	0	68.18	inf	AT4G26490	"FUNCTIONS IN: molecular_function unknown; INVOLVED IN: biological_process unknown; LOCATED IN: cellular_component unknown; EXPRESSED IN: 11 plant structures; EXPRESSED DURING: 4 anthesis, LP.04 four leaves visible, F mature embryo stage, petal differentiation and expansion stage, E expanded cotyledon stage; CONTAINS InterPro DOMAIN/s: Harpin-induced 1 (InterPro:IPR010847); BEST Arabidopsis thali…
Bra030036	0	10.1761	inf	AT1G79940	ATERDJ2A; ATERDJ2A; heat shock protein binding / unfolded protein binding
Bra030359	0	4.0661	inf	AT5G39050	"transferase/ transferase, transferring acyl groups other than amino-acyl groups"
Bra033135	0	141.37	inf	AT4G00893	LOCATED IN: chloroplast; CONTAINS InterPro DOMAIN/s: Cyclin-like F-box (InterPro:IPR001810); BEST Arabidopsis thaliana protein match is: unknown protein (TAIR:AT4G12370.1); Has 133 Blast hits to 128 proteins in 4 species: Archae - 0; Bacteria - 0; Metazoa - 0; Fungi - 0; Plants - 133; Viruses - 0; Other Eukaryotes - 0 (source: NCBI BLink).
Bra033220	0	6.99034	inf	AT1G02040	zinc finger (C2H2 type) family protein
Bra033843	0	2.31991	inf	AT3G45190	SIT4 phosphatase-associated family protein
Bra034104	0	12.2147	inf	AT5G02500	"HSC70-1, HSP70-1, AT-HSC70-1, HSC70; HSC70-1 (HEAT SHOCK COGNATE PROTEIN 70-1); ATP binding"
Bra034395	0	6.03801	inf	AT1G14800	"FUNCTIONS IN: molecular_function unknown; INVOLVED IN: biological_process unknown; LOCATED IN: cellular_component unknown; CONTAINS InterPro DOMAIN/s: Nucleic acid-binding, OB-fold (InterPro:IPR012340), Nucleic acid-binding, OB-fold-like (InterPro:IPR016027); BEST Arabidopsis thaliana protein match is: F-box family protein (TAIR:AT2G35280.1); Has 109 Blast hits to 109 proteins in 8 species: Arch…
Bra035812	0	2.05926	inf	AT3G20130	CYP705A22; CYP705A22; electron carrier/ heme binding / iron ion binding / monooxygenase/ oxygen binding
Bra036206	0	1.01347	inf	AT1G59620	CW9; CW9; ATP binding
Bra037198	0	18.4438	inf	AT1G20480	4-coumarate--CoA ligase family protein / 4-coumaroyl-CoA synthase family protein
Bra039177	0	26.0125	inf	AT4G19190	zinc knuckle (CCHC-type) family protein
Bra039782	0	19.306	inf	AT3G53430	60S ribosomal protein L12 (RPL12B)
Bra040672	0	25.7841	inf	AT5G58220	TTL; TTL (Transthyretin-Like protein); steroid binding
Bra040897	0	5.60197	inf	AT3G57420	unknown protein
Bra009739	65.9529	1912.92	4.85819	AT5G24165	unknown protein
Bra032942	4.92898	98.7241	4.32404	AT3G26700	protein kinase family protein
Bra029392	3.47885	54.4211	3.96748	AT5G24150	"SQP1, SQE5; SQP1; squalene monooxygenase"
Bra002316	68.2996	795.789	3.54244	AT5G20630	"GLP3, GLP3A, GLP3B, ATGER3, GER3; GER3 (GERMIN 3); oxalate oxidase"
Bra034154	48.8713	400.785	3.03577	AT3G10920	"MSD1, MEE33, ATMSD1; MSD1 (MANGANESE SUPEROXIDE DISMUTASE 1); metal ion binding / superoxide dismutase"
Bra005390	170.224	20.4327	-3.05848	AT2G34810	FAD-binding domain-containing protein
Bra027243	448.369	46.5465	-3.26794	AT3G15450	unknown protein
Bra004792	489.533	47.3448	-3.37013	AT2G43910	"thiol methyltransferase, putative"
Bra011821	106.876	9.72847	-3.45757	AT4G39950	CYP79B2; electron carrier/ heme binding / iron ion binding / monooxygenase/ oxygen binding
Bra010627	236.346	21.0875	-3.48644	AT4G37990	ELI3-2, ELI3, ATCAD8, CAD-B2; ELI3-2 (ELICITOR-ACTIVATED GENE 3-2); aryl-alcohol dehydrogenase/ mannitol dehydrogenase"
Bra016205	79.3416	6.60936	-3.58549	AT1G70530	protein kinase family protein
Bra018970	406.492	32.7573	-3.63334	AT1G52410	TSA1; TSA1 (TSK-ASSOCIATING PROTEIN 1); calcium ion binding / protein binding
Bra037704	1247.45	100.03	-3.64048	AT2G43540	unknown protein
Bra037705	1247.45	100.03	-3.64048	AT2G43510	ATTI1; ATTI1; serine-type endopeptidase inhibitor
Bra020549	2289.31	170.329	-3.74852	AT5G26000	"TGG1, BGLU38; TGG1 (THIOGLUCOSIDE GLUCOHYDROLASE 1); hydrolase, hydrolyzing O-glycosyl compounds / thioglucosidase"
Bra020550	2289.31	170.329	-3.74852	AT5G26650	AGL36; AGL36 (AGAMOUS-LIKE 36); DNA binding / transcription factor
Bra020551	2289.31	170.329	-3.74852	AT5G26000	"TGG1, BGLU38; TGG1 (THIOGLUCOSIDE GLUCOHYDROLASE 1); hydrolase, hydrolyzing O-glycosyl compounds / thioglucosidase"
Bra010320	180.268	9.40931	-4.25991	AT4G29700	type I phosphodiesterase/nucleotide pyrophosphatase family protein
Bra022160	902.249	45.2555	-4.31736	AT3G16460	jacalin lectin family protein
Bra022161	902.249	45.2555	-4.31736	AT3G16470	JR1; JR1
Bra016073	679.072	33.6478	-4.33498	AT1G72290	trypsin and protease inhibitor family protein / Kunitz family protein
Bra016002	350.454	16	-4.45308	AT1G73260	trypsin and protease inhibitor family protein / Kunitz family protein
Bra016070	156.371	7.06602	-4.46794	AT1G72290	trypsin and protease inhibitor family protein / Kunitz family protein
Bra000129	729.996	28.6701	-4.67027	AT2G39310	JAL22; JAL22 (JACALIN-RELATED LECTIN 22)
Bra003263	111.96	3.86145	-4.85769	AT3G57020	strictosidine synthase family protein
Bra011759	157.412	5.36097	-4.87591	AT4G37410	CYP81F4; CYP81F4; electron carrier/ heme binding / iron ion binding / monooxygenase/ oxygen binding
Bra033148	301.542	9.66474	-4.96348	AT4G11320	"cysteine proteinase, putative"
Bra009148	111.549	3.04074	-5.1971	AT1G13080	CYP71B2; CYP71B2 (CYTOCHROME P450 71B2); electron carrier/ heme binding / iron ion binding / monooxygenase/ oxygen binding
Bra010598	161.367	3.58132	-5.49371	AT4G37410	CYP81F4; CYP81F4; electron carrier/ heme binding / iron ion binding / monooxygenase/ oxygen binding
Bra027987	384.785	7.89679	-5.60664	AT5G03610	GDSL-motif lipase/hydrolase family protein
Bra018969	1890.24	33.4985	-5.81833	AT1G52400	"BGL1, BGLU18; BGLU18 (BETA GLUCOSIDASE 18); catalytic/ cation binding / hydrolase, hydrolyzing O-glycosyl compounds"
Bra009764	808.966	5.92182	-7.0939	AT5G24420	glucosamine/galactosamine-6-phosphate isomerase-related
Heat treatment for 1h
Gene	GHA_1h	XK_1h	log2(fold_change)	A. thaliana gene	BLASTX annotations
Bra011711	157.699	11.9451	-3.72269	AT4G36850	INVOLVED IN: biological_process unknown; LOCATED IN: membrane; CONTAINS InterPro DOMAIN/s: Cystinosin/ERS1p repeat (InterPro:IPR006603); BEST Arabidopsis thaliana protein match is: PQ-loop repeat family protein / transmembrane family protein (TAIR:AT2G41050.1); Has 599 Blast hits to 441 proteins in 106 species: Archae - 0; Bacteria - 0; Metazoa - 197; Fungi - 311; Plants - 38; Viruses - 0; Other …
Bra013589	17.9158	0	#NAME?	AT3G43790	ZIFL2; ZIFL2 (ZINC INDUCED FACILITATOR-like 2); carbohydrate transmembrane transporter/ sugar:hydrogen symporter
Bra013588	17.9158	0	#NAME?	AT1G48920	"ATNUC-L1, PARL1; ATNUC-L1; nucleic acid binding / nucleotide binding"
Bra013714	287.389	4.34167	-6.04861	AT4G23600	"CORI3, JR2; CORI3 (CORONATINE INDUCED 1); cystathionine beta-lyase/ transaminase"
Bra026456	2.31562	0	#NAME?	AT4G26200	"ACS7, ATACS7; ACS7; 1-aminocyclopropane-1-carboxylate synthase"
Bra026293	0	1.26345	inf	AT4G28000	ATP binding / ATPase/ nucleoside-triphosphatase/ nucleotide binding
Bra039540	74.1696	11.0149	-2.75138	AT4G15530	"PPDK; PPDK (pyruvate orthophosphate dikinase); kinase/ pyruvate, phosphate dikinase"
Bra038898	2.84424	0	#NAME?	AT3G51430	YLS2; YLS2; strictosidine synthase
Bra031393	0	12.7782	inf	AT1G61800	GPT2; GPT2; antiporter/ glucose-6-phosphate transmembrane transporter
Bra034104	0	9.5365	inf	AT5G02500	"HSC70-1, HSP70-1, AT-HSC70-1, HSC70; HSC70-1 (HEAT SHOCK COGNATE PROTEIN 70-1); ATP binding"
Bra039764	0	1.28445	inf	AT4G08180	ORP1C; ORP1C (OSBP(OXYSTEROL BINDING PROTEIN)-RELATED PROTEIN 1C); oxysterol binding / phosphoinositide binding
Bra026433	0	4.87711	inf	AT1G52940	"PAP5, ATPAP5; PAP5 (PURPLE ACID PHOSPHATASE 5); acid phosphatase/ protein serine/threonine phosphatase"
Bra038223	5.17772	0	#NAME?	AT3G19640	magnesium transporter CorA-like family protein (MRS2-3)
Bra037554	1.30408	0	#NAME?	AT1G67020	FUNCTIONS IN: molecular_function unknown; INVOLVED IN: biological_process unknown; LOCATED IN: cellular_component unknown; EXPRESSED IN: leaf; CONTAINS InterPro DOMAIN/s: Retrotransposon gag protein (InterPro:IPR005162); Has 53 Blast hits to 53 proteins in 6 species: Archae - 0; Bacteria - 0; Metazoa - 0; Fungi - 0; Plants - 53; Viruses - 0; Other Eukaryotes - 0 (source: NCBI BLink).
Bra021175	18.7557	0	#NAME?	AT3G16400	"ATMLP-470, NSP1, ATNSP1; NSP1 (NITRILE SPECIFIER PROTEIN 1)"
Bra021531	0	22.6629	inf	AT3G14080	"small nuclear ribonucleoprotein, putative / snRNP, putative / Sm protein, putative"
Bra034154	26.9671	204.578	2.92338	AT3G10920	"MSD1, MEE33, ATMSD1; MSD1 (MANGANESE SUPEROXIDE DISMUTASE 1); metal ion binding / superoxide dismutase"
Bra034095	14.2659	181.765	3.67143	AT1G74670	"gibberellin-responsive protein, putative"
Bra034071	0	18.1578	inf	AT1G13920	remorin family protein
Bra023587	0	4.83506	inf	AT5G16890	exostosin family protein
Bra020315	4.94449	0	#NAME?	AT5G59490	haloacid dehalogenase-like hydrolase family protein
Bra022535	157.471	2.26663	-6.11839	AT3G45140	"LOX2, ATLOX2; LOX2 (LIPOXYGENASE 2); lipoxygenase"
Bra040633	23.1347	0	#NAME?	AT3G44840	S-adenosyl-L-methionine:carboxyl methyltransferase family protein
Bra007937	266.815	21.9054	-3.60648	AT1G70700	"JAZ9, TIFY7; TIFY7"
Bra007985	11.3194	91.3102	3.01198	AT1G71800	"cleavage stimulation factor, putative"
Bra008025	6415.98	57.8573	-6.79303	AT1G72290	trypsin and protease inhibitor family protein / Kunitz family protein
Bra008026	34.5045	0	#NAME?	AT1G72290	trypsin and protease inhibitor family protein / Kunitz family protein
Bra008055	0	29.2089	inf	AT4G09420	"disease resistance protein (TIR-NBS class), putative"
Bra008056	0	2.68875	inf	AT5G17680	"disease resistance protein (TIR-NBS-LRR class), putative"
Bra008311	6.95134	0	#NAME?	AT1G77510	"ATPDIL1-2, PDI6, ATPDI6; ATPDIL1-2 (PDI-LIKE 1-2); protein disulfide isomerase"
Bra032984	77.7062	686.593	3.14335	AT3G27160	GHS1; GHS1 (GLUCOSE HYPERSENSITIVE 1); structural constituent of ribosome
Bra033114	19.3554	0	#NAME?	AT2G30530	unknown protein
Bra020697	0	9.28847	inf	AT5G48480	unknown protein
Bra029392	0	41.4652	inf	AT5G24150	"SQP1, SQE5; SQP1; squalene monooxygenase"
Bra028884	50.4544	0	#NAME?	AT2G26370	MD-2-related lipid recognition domain-containing protein / ML domain-containing protein
Bra023463	0	15.5156	inf	AT5G14390	FUNCTIONS IN: molecular_function unknown; INVOLVED IN: biological_process unknown; LOCATED IN: endomembrane system; EXPRESSED IN: 19 plant structures; EXPRESSED DURING: 11 growth stages; CONTAINS InterPro DOMAIN/s: Alpha/beta hydrolase fold-1 (InterPro:IPR000073); BEST Arabidopsis thaliana protein match is: unknown protein (TAIR:AT3G01690.1); Has 2904 Blast hits to 2898 proteins in 507 species: A…
Bra035631	0	1.71339	inf	AT5G56810	F-box family protein
Bra008008	11.2092	0	#NAME?	AT1G72110	unknown protein
Bra008010	5.28432	0	#NAME?	AT1G72110	unknown protein
Bra008053	0	14.0307	inf	AT1G72840	ATP binding / protein binding / transmembrane receptor
Bra008101	9.68765	204.741	4.40151	AT1G73540	atnudt21; atnudt21 (Arabidopsis thaliana Nudix hydrolase homolog 21); hydrolase
Bra008184	109.573	11.1706	-3.29412	AT1G75220	"integral membrane protein, putative"
Bra008302	2.86879	0	#NAME?	AT1G77330	"1-aminocyclopropane-1-carboxylate oxidase, putative / ACC oxidase, putative"
Bra008412	0	4.99697	inf	AT5G19780	TUA5; TUA5; structural constituent of cytoskeleton
Bra033157	0	1.88994	inf	AT4G11100	unknown protein
Bra021983	0	9.89446	inf	AT5G45590	unknown protein
Bra022069	0	10.0793	inf	AT5G46520	ATP binding / nucleoside-triphosphatase/ nucleotide binding / protein binding / transmembrane receptor
Bra022068	0	10.0793	inf	AT5G46840	RNA recognition motif (RRM)-containing protein
Bra022071	0	4.19554	inf	AT5G46450	"disease resistance protein (TIR-NBS-LRR class), putative"
Bra033031	0	1.94339	inf	AT3G27930	unknown protein
Bra020675	26.142	0	#NAME?	AT5G48850	ATSDI1; ATSDI1 (SULPHUR DEFICIENCY-INDUCED 1); binding
Bra020643	0	26.6005	inf	AT1G06900	catalytic/ metal ion binding / metalloendopeptidase/ zinc ion binding
Bra005909	0	7.04701	inf	AT5G03480	nucleic acid binding / nucleotide binding
Bra006089	0	21.8675	inf	AT1G01010	ANAC001; ANAC001 (Arabidopsis NAC domain containing protein 1); transcription factor
Bra006115	0	1200.41	inf
Bra006212	86.6037	7.26686	-3.57502	AT5G13740	ZIF1; ZIF1 (ZINC INDUCED FACILITATOR 1); carbohydrate transmembrane transporter/ sugar:hydrogen symporter/ tetracycline:hydrogen antiporter
Bra006330	0	1.45212	inf	AT3G16620	"ATTOC120, TOC120; ATTOC120; GTP binding"
Bra006711	0	5.99729	inf	AT5G59540	"oxidoreductase, 2OG-Fe(II) oxygenase family protein"
Bra022815	200.475	23.6795	-3.08172	AT2G30860	"ATGSTF9, GLUTTR, ATGSTF7; ATGSTF9 (GLUTATHIONE S-TRANSFERASE PHI 9); copper ion binding / glutathione binding / glutathione peroxidase/ glutathione transferase"
Bra000059	42.98	0	#NAME?	AT2G38380	peroxidase 22 (PER22) (P22) (PRXEA) / basic peroxidase E
Bra000811	14.0815	185.439	3.71907	AT4G05010	F-box family protein
Bra001086	0	14.4272	inf	AT1G06190	"ATP binding / ATPase, coupled to transmembrane movement of ions, phosphorylative mechanism"
Bra001338	0	3.26294	inf	AT3G08900	"RGP3, RGP; RGP3 (REVERSIBLY GLYCOSYLATED POLYPEPTIDE 3); transferase, transferring hexosyl groups"
Bra001341	12.6733	0	#NAME?	AT3G08860	"alanine--glyoxylate aminotransferase, putative / beta-alanine-pyruvate aminotransferase, putative / AGT, putative"
Bra001377	677.094	38.3603	-4.14167	AT5G05090	myb family transcription factor
Bra001447	0	51.1149	inf	AT3G12290	"tetrahydrofolate dehydrogenase/cyclohydrolase, putative"
Bra001787	352.49	10.6346	-5.05074	AT3G20370	meprin and TRAF homology domain-containing protein / MATH domain-containing protein
Bra012925	0	20.7093	inf	AT3G49670	BAM2; BAM2 (BARELY ANY MERISTEM 2); ATP binding / protein binding / protein kinase/ protein serine/threonine kinase
Bra012889	413.992	37.3352	-3.47099	AT3G50770	"calmodulin-related protein, putative"
Bra019313	0	3.9562	inf	AT4G23190	"CRK11, AT-RLK3; CRK11 (CYSTEINE-RICH RLK11); kinase/ protein kinase"
Bra019067	9.41964	0	#NAME?	AT4G27170	2S seed storage protein 4 / 2S albumin storage protein / NWMU2-2S albumin 4
Bra005937	3.83027	0	#NAME?	AT5G07470	"PMSR3, ATMSRA3; PMSR3 (PEPTIDEMETHIONINE SULFOXIDE REDUCTASE 3); oxidoreductase, acting on sulfur group of donors, disulfide as acceptor / peptide-methionine-(S)-S-oxide reductase"
Bra005939	24.0161	0	#NAME?	AT5G07470	"PMSR3, ATMSRA3; PMSR3 (PEPTIDEMETHIONINE SULFOXIDE REDUCTASE 3); oxidoreductase, acting on sulfur group of donors, disulfide as acceptor / peptide-methionine-(S)-S-oxide reductase"
Bra005938	24.0161	0	#NAME?	AT5G07470	"PMSR3, ATMSRA3; PMSR3 (PEPTIDEMETHIONINE SULFOXIDE REDUCTASE 3); oxidoreductase, acting on sulfur group of donors, disulfide as acceptor / peptide-methionine-(S)-S-oxide reductase"
Bra005940	7.23864	0	#NAME?	AT5G07470	"PMSR3, ATMSRA3; PMSR3 (PEPTIDEMETHIONINE SULFOXIDE REDUCTASE 3); oxidoreductase, acting on sulfur group of donors, disulfide as acceptor / peptide-methionine-(S)-S-oxide reductase"
Bra006098	0	19.2482	inf	AT3G25860	"LTA2, PLE2; LTA2; dihydrolipoyllysine-residue acetyltransferase"
Bra006468	0	53.4129	inf	AT2G27470	"NF-YB11; NF-YB11 (NUCLEAR FACTOR Y, SUBUNIT B11); transcription factor"
Bra029130	0	15.3758	inf	AT5G46630	clathrin adaptor complexes medium subunit family protein
Bra022997	3.10514	0	#NAME?	AT2G34930	disease resistance family protein
Bra000045	8.57416	0	#NAME?	AT2G38240	"oxidoreductase, 2OG-Fe(II) oxygenase family protein"
Bra000548	12.8591	0	#NAME?	AT2G24850	"TAT3, TAT; TAT3 (TYROSINE AMINOTRANSFERASE 3); L-tyrosine:2-oxoglutarate aminotransferase/ transaminase"
Bra001453	837.153	5.53106	-7.24179	AT3G12500	"ATHCHIB, PR3, PR-3, CHI-B, B-CHI; ATHCHIB (ARABIDOPSIS THALIANA BASIC CHITINASE); chitinase"
Bra001729	135.149	8.71374	-3.95512	AT3G18990	"VRN1, REM39; VRN1 (REDUCED VERNALIZATION RESPONSE 1); transcription repressor"
Bra038808	0	1.1195	inf	AT1G10000	nucleic acid binding / ribonuclease H
Bra038766	2.5689	0	#NAME?	AT4G21650	subtilase family protein
Bra017622	0	5.9395	inf	AT4G34020	DJ-1 family protein
Bra014643	0	6.53219	inf	AT3G57240	"BG3; BG3 (BETA-1,3-GLUCANASE 3); cellulase/ hydrolase, hydrolyzing O-glycosyl compounds"
Bra039782	0	9.92025	inf	AT3G53430	60S ribosomal protein L12 (RPL12B)
Bra028214	0	126.669	inf	AT5G38980	unknown protein
Bra032090	11.4003	0	#NAME?	AT5G67310	CYP81G1; CYP81G1; electron carrier/ heme binding / iron ion binding / monooxygenase/ oxygen binding
Bra034344	0	2.34157	inf	AT3G57020	strictosidine synthase family protein
Bra021673	389.356	55.392	-2.81334	AT2G30860	"ATGSTF9, GLUTTR, ATGSTF7; ATGSTF9 (GLUTATHIONE S-TRANSFERASE PHI 9); copper ion binding / glutathione binding / glutathione peroxidase/ glutathione transferase"
Bra017243	0	3.5547	inf	AT4G19210	"ATRLI2, RLI2; ATRLI2; transporter"
Bra017242	0	3.57273	inf	AT3G13680	F-box family protein
Bra017128	0	8.94259	inf	AT5G03480	nucleic acid binding / nucleotide binding
Bra037695	0	9.79079	inf	AT2G43650	EMB2777; EMB2777 (EMBRYO DEFECTIVE 2777)
Bra014416	10.6573	0	#NAME?	AT3G61930	unknown protein
Bra014725	0	2.52609	inf	AT3G55720	unknown protein
Bra025485	62.083	7.46036	-3.05688	AT5G41610	"ATCHX18, CHX18; ATCHX18; monovalent cation:proton antiporter/ sodium:hydrogen antiporter"
Bra032150	280.173	32.5093	-3.10739	AT3G20370	meprin and TRAF homology domain-containing protein / MATH domain-containing protein
Bra037675	229.981	21.6354	-3.41005	AT2G43910	"thiol methyltransferase, putative"
Bra004837	1.18526	0	#NAME?	AT2G44460	"BGLU28; BGLU28 (BETA GLUCOSIDASE 28); catalytic/ cation binding / hydrolase, hydrolyzing O-glycosyl compounds"
Bra004838	1.78254	0	#NAME?	AT5G24540	"BGLU31; BGLU31 (BETA GLUCOSIDASE 31); catalytic/ cation binding / hydrolase, hydrolyzing O-glycosyl compounds"
Bra005334	0	17.1475	inf	AT1G63190	"FUNCTIONS IN: molecular_function unknown; LOCATED IN: cellular_component unknown; EXPRESSED IN: sperm cell, male gametophyte, flower, pollen tube; EXPRESSED DURING: L mature pollen stage, M germinated pollen stage, 4 anthesis; CONTAINS InterPro DOMAIN/s: Cystatin-related, plant (InterPro:IPR006525); BEST Arabidopsis thaliana protein match is: unknown protein (TAIR:AT1G63200.1); Has 24 Blast hits…
Bra018251	9.72909	0	#NAME?	AT2G31360	ADS2; ADS2 (16:0Delta9 Arabidopsis desaturase 2); oxidoreductase
Bra018311	82.4013	9.72074	-3.08353	AT2G30490	"ATC4H, C4H, CYP73A5; C4H (CINNAMATE-4-HYDROXYLASE); trans-cinnamate 4-monooxygenase"
Bra030402	1.25145	0	#NAME?	AT1G52000	jacalin lectin family protein
Bra034413	126.41	14.8216	-3.09234	AT1G35580	CINV1; CINV1 (cytosolic invertase 1); beta-fructofuranosidase
Bra034418	0	3.10727	inf	AT1G29720	protein kinase family protein
Bra022161	1161.23	5.13288	-7.82167	AT3G16470	JR1; JR1
Bra039177	0	7.46996	inf	AT4G19190	zinc knuckle (CCHC-type) family protein
Bra004792	316.351	12.7392	-4.63418	AT2G43910	"thiol methyltransferase, putative"
Bra005390	66.4009	3.78941	-4.13116	AT2G34810	FAD-binding domain-containing protein
Bra005609	526.818	33.8112	-3.96173	AT2G32150	haloacid dehalogenase-like hydrolase family protein
Bra005649	19.3278	0	#NAME?	AT1G23330	unknown protein
Bra018471	0	2.10175	inf	AT4G12320	CYP706A6; CYP706A6; electron carrier/ heme binding / iron ion binding / monooxygenase/ oxygen binding
Bra030385	142.499	3.23535	-5.46088	AT1G52410	TSA1; TSA1 (TSK-ASSOCIATING PROTEIN 1); calcium ion binding / protein binding
Bra032251	0	26.138	inf	AT5G02800	protein kinase family protein
Bra033901	158.423	14.9574	-3.40485	AT3G22890	APS1; APS1 (ATP SULFURYLASE 1); sulfate adenylyltransferase (ATP)
Bra040600	0	429.959	inf	AT3G02790	zinc finger (C2H2 type) family protein
Bra037954	406.211	9.09617	-5.48082	AT1G54020	"myrosinase-associated protein, putative"
Bra019002	372.125	44.7549	-3.05567	AT3G15450	unknown protein
Bra026138	561.622	32.8918	-4.0938	AT1G15380	lactoylglutathione lyase family protein / glyoxalase I family protein
Bra025730	4.10318	0	#NAME?	AT1G19320	pathogenesis-related thaumatin family protein
Bra018156	27.0126	0	#NAME?	AT4G24450	"GWD3, PWD, ATGWD2; PWD (PHOSPHOGLUCAN, WATER DIKINASE); ATP binding / kinase"
Bra018154	27.0126	0	#NAME?	AT5G15150	"ATHB-3, HAT7, ATHB3; ATHB-3 (ARABIDOPSIS THALIANA HOMEOBOX 3); DNA binding / sequence-specific DNA binding / transcription factor"
Bra037506	1110.59	94.1071	-3.56088	AT5G48180	NSP5; NSP5 (NITRILE SPECIFIER PROTEIN 5)
Bra024933	0	129.339	inf	AT5G47570	unknown protein
Bra033690	1.9331	0	#NAME?	AT5G43650	basic helix-loop-helix (bHLH) family protein
Bra033626	0	2.03402	inf	AT4G32170	CYP96A2; CYP96A2; electron carrier/ heme binding / iron ion binding / monooxygenase/ oxygen binding
Bra038033	0	2.72847	inf	AT3G13040	myb family transcription factor
Bra039700	20.3456	0	#NAME?	AT1G53903	CONTAINS InterPro DOMAIN/s: Protein of unknown function DUF581 (InterPro:IPR007650); BEST Arabidopsis thaliana protein match is: senescence-associated protein-related (TAIR:AT1G53885.1); Has 277 Blast hits to 277 proteins in 14 species: Archae - 0; Bacteria - 0; Metazoa - 0; Fungi - 0; Plants - 277; Viruses - 0; Other Eukaryotes - 0 (source: NCBI BLink).
Bra018970	270.682	1.85954	-7.18551	AT1G52410	TSA1; TSA1 (TSK-ASSOCIATING PROTEIN 1); calcium ion binding / protein binding
Bra018969	2547.68	3.11574	-9.6754	AT1G52400	"BGL1, BGLU18; BGLU18 (BETA GLUCOSIDASE 18); catalytic/ cation binding / hydrolase, hydrolyzing O-glycosyl compounds"
Bra018611	180.904	11.6251	-3.95991	AT1G08630	THA1; THA1 (Threonine Aldolase 1); aldehyde-lyase/ threonine aldolase
Bra019843	0	1.29736	inf	AT4G21380	ARK3; ARK3 (A. THALIANA RECEPTOR KINASE 3); kinase/ transmembrane receptor protein serine/threonine kinase
Bra019741	712.943	96.662	-2.88277	AT1G12080	unknown protein
Bra025684	0	9.16143	inf	AT2G27100	SE; SE (SERRATE); DNA binding / transcription factor
Bra025756	273.747	7.82752	-5.12814	AT1G19670	"ATCLH1, CORI1, ATHCOR1; ATCLH1 (ARABIDOPSIS THALIANA CORONATINE-INDUCED PROTEIN 1); chlorophyllase"
Bra025850	0	2.87442	inf	AT1G20860	phosphate transporter family protein
Bra010126	0	42.8661	inf	AT5G62840	phosphoglycerate/bisphosphoglycerate mutase family protein
Bra009763	254.063	9.35057	-4.76399	AT5G24420	glucosamine/galactosamine-6-phosphate isomerase-related
Bra024962	0	3.66069	inf	AT5G29000	myb family transcription factor
Bra039903	0	18.4231	inf	AT1G02305	"cathepsin B-like cysteine protease, putative"
Bra015212	0	9.288	inf	AT5G03340	"cell division cycle protein 48, putative / CDC48, putative"
Bra015041	3.75124	0	#NAME?	AT5G60980	nuclear transport factor 2 (NTF2) family protein / RNA recognition motif (RRM)-containing protein
Bra014901	0	2.32758	inf	AT4G15970	unknown protein
Bra014891	68.5333	8.7036	-2.97712	AT1G30820	"CTP synthase, putative / UTP--ammonia ligase, putative"
Bra030050	0	19.4208	inf	AT1G27435	unknown protein
Bra011969	3.22216	0	#NAME?	AT1G08080	"ATACA7, ACA7; ACA7 (ALPHA CARBONIC ANHYDRASE 7); carbonate dehydratase/ zinc ion binding"
Bra003412	6.30652	0	#NAME?	AT3G60440	"LOCATED IN: chloroplast; EXPRESSED IN: 19 plant structures; EXPRESSED DURING: 13 growth stages; CONTAINS InterPro DOMAIN/s: Phosphoglycerate mutase (InterPro:IPR013078), PRIB5 (InterPro:IPR012398); BEST Arabidopsis thaliana protein match is: unknown protein (TAIR:AT3G60450.1); Has 180 Blast hits to 178 proteins in 74 species: Archae - 0; Bacteria - 37; Metazoa - 8; Fungi - 48; Plants - 35; Virus…
Bra003696	40.056	0	#NAME?	AT1G76955	Expressed protein
Bra004058	66.6219	3.87044	-4.10543	AT3G45140	"LOX2, ATLOX2; LOX2 (LIPOXYGENASE 2); lipoxygenase"
Bra004059	66.6219	3.87044	-4.10543	AT3G45140	"LOX2, ATLOX2; LOX2 (LIPOXYGENASE 2); lipoxygenase"
Bra004057	66.6219	3.87044	-4.10543	AT3G45140	"LOX2, ATLOX2; LOX2 (LIPOXYGENASE 2); lipoxygenase"
Bra004060	66.6219	3.87044	-4.10543	AT3G45140	"LOX2, ATLOX2; LOX2 (LIPOXYGENASE 2); lipoxygenase"
Bra004273	7.80514	0	#NAME?	AT1G67980	CCOAMT; CCoAMT; caffeoyl-CoA O-methyltransferase
Bra016193	187.803	25.5709	-2.87664	AT1G70700	"JAZ9, TIFY7; TIFY7"
Bra016072	61.7399	0	#NAME?	AT1G72290	trypsin and protease inhibitor family protein / Kunitz family protein
Bra035108	0	4.97612	inf	AT1G79330	"AMC6, ATMCP2B, ATMC5; ATMC5 (ARABIDOPSIS THALIANA METACASPASE 5); cysteine-type endopeptidase"
Bra001988	5.60388	0	#NAME?	AT3G44840	S-adenosyl-L-methionine:carboxyl methyltransferase family protein
Bra015011	0	38.4855	inf	AT1G14800	"FUNCTIONS IN: molecular_function unknown; INVOLVED IN: biological_process unknown; LOCATED IN: cellular_component unknown; CONTAINS InterPro DOMAIN/s: Nucleic acid-binding, OB-fold (InterPro:IPR012340), Nucleic acid-binding, OB-fold-like (InterPro:IPR016027); BEST Arabidopsis thaliana protein match is: F-box family protein (TAIR:AT2G35280.1); Has 109 Blast hits to 109 proteins in 8 species: Arch…
Bra030036	0	3.11332	inf	AT1G79940	ATERDJ2A; ATERDJ2A; heat shock protein binding / unfolded protein binding
Bra028403	0	2.25616	inf	AT5G38280	PR5K; PR5K; kinase/ transmembrane receptor protein serine/threonine kinase
Bra028470	0	6.81769	inf	AT1G44835	YbaK/prolyl-tRNA synthetase family protein
Bra004101	0	10.0664	inf	AT4G26690	"SHV3, MRH5, GPDL2; SHV3 (SHAVEN 3); glycerophosphodiester phosphodiesterase/ kinase"
Bra016251	0	7.53358	inf	AT2G33990	iqd9; iqd9 (IQ-domain 9); calmodulin binding
Bra016205	100.408	1.61385	-5.95923	AT1G70530	protein kinase family protein
Bra015981	379.867	26.1208	-3.86222	AT1G58270	ZW9; ZW9
Bra015728	21.0225	0	#NAME?	AT1G76640	"calmodulin-related protein, putative"
Bra015656	7.74297	56.0412	2.85553	AT1G77760	"NIA1, GNR1, NR1; NIA1 (NITRATE REDUCTASE 1); nitrate reductase"
Bra035179	148.78	16.117	-3.20653	AT1G15690	"AVP1, ATAVP3, AVP-3; AVP1; ATPase/ hydrogen-translocating pyrophosphatase"
Bra014271	0	5.56923	inf	AT1G51350	armadillo/beta-catenin repeat family protein
Bra014261	8.2872	0	#NAME?	AT1G63105	unknown protein
Bra014135	47.3336	0	#NAME?	AT1G48405	FUNCTIONS IN: molecular_function unknown; INVOLVED IN: biological_process unknown; CONTAINS InterPro DOMAIN/s: KIP1-like (InterPro:IPR011684); BEST Arabidopsis thaliana protein match is: unknown protein (TAIR:AT3G17680.1); Has 119 Blast hits to 117 proteins in 34 species: Archae - 0; Bacteria - 22; Metazoa - 7; Fungi - 8; Plants - 57; Viruses - 0; Other Eukaryotes - 25 (source: NCBI BLink).
Bra013990	0	7.66753	inf
Bra034941	223.219	7.63524	-4.86964	AT4G31500	"CYP83B1, SUR2, RNT1, RED1, ATR4; CYP83B1 (CYTOCHROME P450 MONOOXYGENASE 83B1); oxidoreductase, acting on paired donors, with incorporation or reduction of molecular oxygen, NADH or NADPH as one donor, and incorporation of one atom of oxygen / oxygen binding"
Bra010320	126.227	3.28157	-5.26549	AT4G29700	type I phosphodiesterase/nucleotide pyrophosphatase family protein
Bra010332	1610.6	59.9826	-4.74691	AT4G29270	acid phosphatase class B family protein
Bra030784	0	10.7816	inf	AT1G09550	"pectinacetylesterase, putative"
Bra030969	0	17.2498	inf	AT3G07900	unknown protein
Bra014327	0	26.2113	inf	AT2G01300	unknown protein
Bra014032	0	6.40572	inf	AT1G44835	YbaK/prolyl-tRNA synthetase family protein
Bra014000	0	8.69698	inf	AT4G13850	"ATGRP2, GR-RBP2, GRP2; GR-RBP2 (GLYCINE-RICH RNA-BINDING PROTEIN 2); ATP binding / RNA binding / double-stranded DNA binding / single-stranded DNA binding"
Bra040350	0	91.5494	inf	AT3G07970	QRT2; QRT2 (QUARTET 2); polygalacturonase
Bra035533	0	127.221	inf	AT2G06520	PSBX; PSBX (photosystem II subunit X)
Bra038432	99.0477	2.165	-5.51569	AT1G31710	"copper amine oxidase, putative"
Bra016307	199.619	10.0983	-4.30507	AT1G27110	binding
Bra037369	3.83157	0	#NAME?	AT4G01230	reticulon family protein (RTNLB7)
Bra034188	35.4432	0	#NAME?	AT4G03130	transcription coactivator
Bra034216	35.4432	0	#NAME?	AT5G45570	Ulp1 protease family protein
Bra036234	35.4432	0	#NAME?	AT4G02930	"elongation factor Tu, putative / EF-Tu, putative"
Bra034208	35.4432	0	#NAME?	AT4G03430	"STA1, EMB2770; EMB2770 (EMBRYO DEFECTIVE 2770); RNA splicing factor, transesterification mechanism"
Bra034184	35.4432	0	#NAME?	AT4G03100	"rac GTPase activating protein, putative"
Bra036231	35.4432	0	#NAME?	AT4G05260	ubiquitin family protein
Bra034190	35.4432	0	#NAME?	AT4G03150	unknown protein
Bra034183	35.4432	0	#NAME?	AT4G03090	sequence-specific DNA binding / transcription factor
Bra036235	35.4432	0	#NAME?	AT4G11550	DC1 domain-containing protein
Bra034179	35.4432	0	#NAME?	AT4G03030	kelch repeat-containing F-box family protein
Bra034219	35.4432	0	#NAME?	AT4G03560	"ATTPC1, TPC1, ATCCH1, FOU2; ATTPC1 (TWO-PORE CHANNEL 1); calcium channel/ voltage-gated calcium channel"
Bra036229	35.4432	0	#NAME?	AT4G02980	"ABP1, ABP; ABP1 (ENDOPLASMIC RETICULUM AUXIN BINDING PROTEIN 1); auxin binding"
Bra034196	35.4432	0	#NAME?	AT4G03250	homeobox-leucine zipper family protein
Bra034207	35.4432	0	#NAME?	AT4G03420	unknown protein
Bra034212	35.4432	0	#NAME?	AT4G03510	RMA1; RMA1; protein binding / ubiquitin-protein ligase/ zinc ion binding
Bra034178	35.4432	0	#NAME?	AT4G03020	transducin family protein / WD-40 repeat family protein
Bra036232	35.4432	0	#NAME?	AT4G05230	ubiquitin family protein
Bra034218	35.4432	0	#NAME?	AT4G03550	"ATGSL05, GSL05, ATGSL5, PMR4, GSL5; ATGSL05 (GLUCAN SYNTHASE-LIKE 5); 1,3-beta-glucan synthase/ transferase, transferring glycosyl groups"
Bra034187	35.4432	0	#NAME?	AT4G03120	proline-rich family protein
Bra034220	35.4432	0	#NAME?	AT4G03580	FUNCTIONS IN: molecular_function unknown; INVOLVED IN: biological_process unknown; LOCATED IN: cellular_component unknown; BEST Arabidopsis thaliana protein match is: cathepsin-related (TAIR:AT5G17080.1); Has 215 Blast hits to 146 proteins in 28 species: Archae - 0; Bacteria - 11; Metazoa - 101; Fungi - 14; Plants - 5; Viruses - 0; Other Eukaryotes - 84 (source: NCBI BLink).
Bra036236	35.4432	0	#NAME?	AT2G26970	exonuclease family protein
Bra034194	35.4432	0	#NAME?	AT4G05460	F-box family protein (FBL20)
Bra034206	35.4432	0	#NAME?	AT4G03415	catalytic/ protein serine/threonine phosphatase
Bra034195	35.4432	0	#NAME?	AT4G03240	"ATFH, FH; FH (FRATAXIN HOMOLOG)"
Bra034189	35.4432	0	#NAME?	AT4G03140	binding / catalytic/ oxidoreductase
Bra034203	35.4432	0	#NAME?	AT1G15780	unknown protein
Bra034185	35.4432	0	#NAME?	AT4G03110	"RNA-binding protein, putative"
Bra034217	35.4432	0	#NAME?	AT4G03550	"ATGSL05, GSL05, ATGSL5, PMR4, GSL5; ATGSL05 (GLUCAN SYNTHASE-LIKE 5); 1,3-beta-glucan synthase/ transferase, transferring glycosyl groups"
Bra034205	35.4432	0	#NAME?	AT4G03400	"DFL2, GH3-10; DFL2 (DWARF IN LIGHT 2)"
Bra034198	35.4432	0	#NAME?	AT4G03270	CYCD6;1; CYCD6;1 (Cyclin D6;1); cyclin-dependent protein kinase
Bra036240	35.4432	0	#NAME?	AT4G02770	PSAD-1; PSAD-1 (photosystem I subunit D-1)
Bra034186	35.4432	0	#NAME?	AT4G03115	binding
Bra036230	35.4432	0	#NAME?	AT4G03370	ubiquitin family protein
Bra036237	35.4432	0	#NAME?	AT4G02830	unknown protein
Bra034192	35.4432	0	#NAME?	AT4G03200	catalytic
Bra034202	35.4432	0	#NAME?	AT4G03330	"SYP123, ATSYP123; SYP123 (SYNTAXIN OF PLANTS 123); SNAP receptor"
Bra034204	35.4432	0	#NAME?	AT4G03390	SRF3; SRF3 (STRUBBELIG-RECEPTOR FAMILY 3); ATP binding / kinase/ protein serine/threonine kinase
Bra034199	35.4432	0	#NAME?	AT5G20030	agenet domain-containing protein
Bra036238	35.4432	0	#NAME?	AT4G02810	unknown protein
Bra034213	35.4432	0	#NAME?	AT3G24870	DNA binding
Bra034180	35.4432	0	#NAME?	AT4G03050	AOP3; AOP3; iron ion binding / oxidoreductase
Bra034215	35.4432	0	#NAME?	AT4G03540	integral membrane family protein
Bra034201	35.4432	0	#NAME?	AT4G03320	TRANSLOCON AT THE INNER ENVELOPE MEMBRANE OF CHLOROPLASTS 20-IV
Bra034193	35.4432	0	#NAME?	AT4G03210	"XTH9; XTH9 (XYLOGLUCAN ENDOTRANSGLUCOSYLASE/HYDROLASE 9); hydrolase, acting on glycosyl bonds / xyloglucan:xyloglucosyl transferase"
Bra036226	35.4432	0	#NAME?	AT4G03010	leucine-rich repeat family protein
Bra036239	35.4432	0	#NAME?	AT4G02780	"GA1, ABC33, ATCPS1; GA1 (GA REQUIRING 1); ent-copalyl diphosphate synthase/ magnesium ion binding"
Bra034182	35.4432	0	#NAME?	AT4G03070	"AOP1, AOP, AOP1.1; AOP1; oxidoreductase, acting on paired donors, with incorporation or reduction of molecular oxygen, 2-oxoglutarate as one donor, and incorporation of one atom each of oxygen into both donors"
Bra034214	35.4432	0	#NAME?	AT4G03520	ATHM2; ATHM2; enzyme activator
Bra034200	35.4432	0	#NAME?	AT4G03280	"PETC, PGR1; PETC (PHOTOSYNTHETIC ELECTRON TRANSFER C); electron transporter, transferring electrons from cytochrome b6/f complex of photosystem II"
Bra034191	35.4432	0	#NAME?	AT4G03190	"GRH1, ATGRH1, AFB1; GRH1 (GRR1-LIKE PROTEIN 1); auxin binding / protein binding / ubiquitin-protein ligase"
Bra036241	35.4432	0	#NAME?	AT4G02760	FUNCTIONS IN: molecular_function unknown; INVOLVED IN: biological_process unknown; LOCATED IN: cellular_component unknown; CONTAINS InterPro DOMAIN/s: Cyclin-like F-box (InterPro:IPR001810); BEST Arabidopsis thaliana protein match is: unknown protein (TAIR:AT4G02740.1); Has 3231 Blast hits to 948 proteins in 145 species: Archae - 0; Bacteria - 50; Metazoa - 1253; Fungi - 344; Plants - 69; Viruses…
Bra034197	35.4432	0	#NAME?	AT4G03260	leucine-rich repeat family protein
Bra036227	35.4432	0	#NAME?	AT4G03000	protein binding / zinc ion binding
Bra034211	35.4432	0	#NAME?	AT4G03440	ankyrin repeat family protein
Bra034209	35.4432	0	#NAME?	AT4G03490	protein binding
Bra036228	35.4432	0	#NAME?	AT4G02990	mitochondrial transcription termination factor family protein / mTERF family protein
Bra034210	35.4432	0	#NAME?	AT4G03440	ankyrin repeat family protein
Bra036233	35.4432	0	#NAME?	AT4G02940	"oxidoreductase, 2OG-Fe(II) oxygenase family protein"
Bra034181	35.4432	0	#NAME?	AT4G03070	"AOP1, AOP, AOP1.1; AOP1; oxidoreductase, acting on paired donors, with incorporation or reduction of molecular oxygen, 2-oxoglutarate as one donor, and incorporation of one atom each of oxygen into both donors"
Bra034221	35.4432	0	#NAME?	AT3G05685	"FUNCTIONS IN: molecular_function unknown; INVOLVED IN: biological_process unknown; LOCATED IN: cellular_component unknown; CONTAINS InterPro DOMAIN/s: Cystatin-related, plant (InterPro:IPR006525); BEST Arabidopsis thaliana protein match is: unknown protein (TAIR:AT5G17090.1); Has 28 Blast hits to 26 proteins in 1 species: Archae - 0; Bacteria - 0; Metazoa - 0; Fungi - 0; Plants - 28; Viruses - 0…
Bra035944	0	9.6892	inf	AT5G61030	GR-RBP3; GR-RBP3 (glycine-rich RNA-binding protein 3); ATP binding / RNA binding
Bra036653	3.38485	0	#NAME?	AT1G62660	"beta-fructosidase (BFRUCT3) / beta-fructofuranosidase / invertase, vacuolar"
Bra027687	63.3909	0	#NAME?	AT1G64220	TOM7-2; TOM7-2 (TRANSLOCASE OF OUTER MEMBraNE 7 KDA SUBUNIT 2); P-P-bond-hydrolysis-driven protein transmembrane transporter
Bra017552	0	3.1522	inf	AT4G04540	protein kinase family protein
Bra029522	0	9.00056	inf	AT3G28040	"leucine-rich repeat transmembrane protein kinase, putative"
Bra036843	19.8061	0	#NAME?	AT3G50980	XERO1; XERO1 (DEHYDRIN XERO 1)
Bra007144	0	7.11999	inf	AT1G48350	ribosomal protein L18 family protein
Bra007812	3.77132	0	#NAME?	AT1G07260	"UGT71C3; UGT71C3 (UDP-GLUCOSYL TRANSFERASE 71C3); UDP-glycosyltransferase/ quercetin 3-O-glucosyltransferase/ transferase, transferring glycosyl groups"
Bra031209	0	5.41483	inf	AT2G21650	"MEE3, ATRL2; MEE3 (MATERNAL EFFECT EMBRYO ARREST 3); DNA binding / transcription factor"
Bra031149	0	5.23477	inf	AT1G33240	"AT-GTL1, AT-GTL2; AT-GTL1 (GT2-LIKE 1); DNA binding / transcription factor"
Bra032419	0	6.54951	inf	AT1G07910	"ATRNL, RNL; RNL (RNA LIGASE); 2',3'-cyclic-nucleotide 3'-phosphodiesterase/ RNA ligase (ATP)/ polynucleotide kinase"
Bra036269	0	8.32871	inf	AT4G02410	lectin protein kinase family protein
Bra036161	0	45.5186	inf	AT5G48760	60S ribosomal protein L13A (RPL13aD)
Bra036158	6.90289	0	#NAME?	AT5G48850	ATSDI1; ATSDI1 (SULPHUR DEFICIENCY-INDUCED 1); binding
Bra037198	0	7.25153	inf	AT1G20480	4-coumarate--CoA ligase family protein / 4-coumaroyl-CoA synthase family protein
Bra027466	3.46562	0	#NAME?	AT5G42930	triacylglycerol lipase
Bra027596	0	4.47563	inf	AT4G01550	anac069; anac069 (Arabidopsis NAC domain containing protein 69); transcription factor
Bra035285	0	19.6188	inf	AT5G55630	"KCO1, TPK1, ATKCO1, ATTPK1; ATKCO1; calcium-activated potassium channel/ ion channel/ outward rectifier potassium channel"
Bra032362	11.3525	0	#NAME?	AT1G30135	"JAZ8, TIFY5A; JAZ8 (JASMONATE-ZIM-DOMAIN PROTEIN 8)"
Bra032800	5.51799	0	#NAME?	AT2G26430	"RCY1, ATRCY1; RCY1 (ARGININE-RICH CYCLIN 1); cyclin-dependent protein kinase regulator"
Bra024662	22.5548	164.097	2.86304	AT1G27100	"FUNCTIONS IN: molecular_function unknown; INVOLVED IN: biological_process unknown; LOCATED IN: vacuole; EXPRESSED IN: 23 plant structures; EXPRESSED DURING: 13 growth stages; CONTAINS InterPro DOMAIN/s: Protein of unknown function DUF569 (InterPro:IPR007679), Actin_cross-linking (InterPro:IPR008999); BEST Arabidopsis thaliana protein match is: unknown protein (TAIR:AT1G69900.1); Has 184 Blast hi…
Bra024661	22.5548	164.097	2.86304	AT1G27100	FUNCTIONS IN: molecular_function unknown; INVOLVED IN: biological_process unknown; LOCATED IN: vacuole; EXPRESSED IN: 23 plant structures; EXPRESSED DURING: 13 growth stages; CONTAINS InterPro DOMAIN/s: Protein of unknown function DUF569 (InterPro:IPR007679), Actin_cross-linking (InterPro:IPR008999); BEST Arabidopsis thaliana protein match is: unknown protein (TAIR:AT1G69900.1); Has 184 Blast hit…
Bra007339	0	4.67645	inf	AT4G15420	PRLI-interacting factor K
Bra007416	0	2.85041	inf	AT3G58750	CSY2; CSY2 (citrate synthase 2); citrate (SI)-synthase
Bra007747	0	7.92644	inf	AT3G63460	WD-40 repeat family protein
Bra030983	2.52921	0	#NAME?	AT1G17340	phosphoinositide phosphatase family protein
Bra031656	22.6777	168.234	2.89112	AT1G09070	"SRC2, (AT)SRC2; SRC2 (SOYBEAN GENE REGULATED BY COLD-2); protein binding"
Bra015510	321.551	24.9377	-3.68864	AT1G06560	NOL1/NOP2/sun family protein
Bra015511	321.551	24.9377	-3.68864	AT1G06570	"PDS1, HPD; PDS1 (PHYTOENE DESATURATION 1); 4-hydroxyphenylpyruvate dioxygenase"
Bra015448	0	1.57323	inf	AT1G05680	UDP-glucoronosyl/UDP-glucosyl transferase family protein
Bra033220	0	1.40656	inf	AT1G02040	zinc finger (C2H2 type) family protein
Bra003060	0	10.4154	inf	AT5G12420	unknown protein
Bra002316	193.349	2832.21	3.87265	AT5G20630	"GLP3, GLP3A, GLP3B, ATGER3, GER3; GER3 (GERMIN 3); oxalate oxidase"
Bra002260	7.79142	0	#NAME?	AT5G19780	TUA5; TUA5; structural constituent of cytoskeleton
Bra009100	4.75367	0	#NAME?	AT5G05260	"CYP79A2; CYP79A2 (CYTOCHROME P450 79A2); oxidoreductase, acting on paired donors, with incorporation or reduction of molecular oxygen, NADH or NADPH as one donor, and incorporation of one atom of oxygen / oxygen binding"
Bra015372	0	4.28087	inf	AT4G24240	"WRKY7, ATWRKY7; WRKY7; calmodulin binding / transcription factor"
Bra002895	0	3.59522	inf	AT2G21950	SKIP6; SKIP6 (SKP1 interacting partner 6); ubiquitin-protein ligase
Bra002700	0	23.7738	inf	AT2G36070	ATTIM44-2; ATTIM44-2; protein-transmembrane transporting ATPase
Bra008575	0	60.6214	inf	AT5G17170	ENH1; ENH1 (enhancer of sos3-1); electron carrier/ metal ion binding / protein binding
Bra009261	49.7461	0	#NAME?	AT5G07460	"PMSR2, ATMSRA2; PMSR2 (PEPTIDEMETHIONINE SULFOXIDE REDUCTASE 2); oxidoreductase, acting on sulfur group of donors, disulfide as acceptor / peptide-methionine-(S)-S-oxide reductase"
Bra009461	306.19	30.1251	-3.34539	AT5G04360	"ATPU1, ATLDA, PU1; ATLDA (LIMIT DEXTRINASE); alpha-amylase/ limit dextrinase/ pullulanase"
Bra009591	0	3.11087	inf	AT3G10180	kinesin motor protein-related
Bra035403	0	1.44316	inf	AT5G35430	binding
Bra038569	13.3533	0	#NAME?	AT1G61120	"TPS04, GES; TPS04 (TERPENE SYNTHASE 04); (E,E)-geranyllinalool synthase"
Bra039398	0	22.3632	inf	AT2G29880	unknown protein
Bra039597	0	81.7667	inf	AT2G43590	"chitinase, putative"
Bra040897	0	4.19275	inf	AT3G57420	unknown protein
Heat treatment for 6h
Gene	GHA_6h	XK_6h	log2(fold_change)	A. thaliana gene	BLASTX annotations
Bra026375	0	6.01148	inf	AT4G27140	2S seed storage protein 1 / 2S albumin storage protein / NWMU1-2S albumin 1
Bra026293	0	1.83954	inf	AT4G28000	ATP binding / ATPase/ nucleoside-triphosphatase/ nucleotide binding
Bra023861	0	6.07846	inf	AT3G21790	UDP-glucoronosyl/UDP-glucosyl transferase family protein
Bra011149	0	7.99898	inf	AT5G63820	unknown protein
Bra038483	0	8.11817	inf	AT4G27140	2S seed storage protein 1 / 2S albumin storage protein / NWMU1-2S albumin 1
Bra023845	199.392	19.0602	-3.38697	AT3G22200	"POP2, GABA-T, HER1; POP2 (POLLEN-PISTIL INCOMPATIBILITY 2); 4-aminobutyrate transaminase/ 4-aminobutyrate:pyruvate transaminase"
Bra034161	0	2.48632	inf	AT3G05650	AtRLP32; AtRLP32 (Receptor Like Protein 32); kinase/ protein binding
Bra040520	14.9833	294.268	4.2957	AT3G01500	CA1; CA1 (CARBONIC ANHYDRASE 1); carbonate dehydratase/ zinc ion binding
Bra028816	0	43.7198	inf	AT1G56530	hydroxyproline-rich glycoprotein family protein
Bra028697	193.328	8.25911	-4.54892	AT5G07440	GDH2; GDH2 (GLUTAMATE DEHYDROGENASE 2); ATP binding / glutamate dehydrogenase [NAD(P)+]/ glutamate dehydrogenase/ oxidoreductase
Bra020312	0	3.58581	inf	AT1G71020	armadillo/beta-catenin repeat family protein / U-box domain-containing protein
Bra020395	0	1.21067	inf	AT5G58050	SVL4; SVL4 (SHV3-LIKE 4); glycerophosphodiester phosphodiesterase/ kinase
Bra022523	6.05347	0	#NAME?	AT5G50700	short-chain dehydrogenase/reductase (SDR) family protein
Bra022492	7.92009	0	#NAME?	AT1G65140	ubiquitin thiolesterase
Bra020470	643.644	13.0973	-5.61892	AT5G24770	"VSP2, ATVSP2; VSP2 (VEGETATIVE STORAGE PROTEIN 2); acid phosphatase"
Bra029269	0	5.16762	inf	AT5G62280	unknown protein
Bra028914	0	17.2221	inf	AT5G01860	zinc finger (C2H2 type) family protein
Bra028884	19.2982	0	#NAME?	AT2G26370	MD-2-related lipid recognition domain-containing protein / ML domain-containing protein
Bra035631	0	2.79013	inf	AT5G56810	F-box family protein
Bra008412	0	15.9518	inf	AT5G19780	TUA5; TUA5; structural constituent of cytoskeleton
Bra029316	0	3.33681	inf	AT5G61550	protein kinase family protein
Bra029306	5.66196	0	#NAME?	AT5G61820	FUNCTIONS IN: molecular_function unknown; INVOLVED IN: biological_process unknown; LOCATED IN: vacuole; EXPRESSED IN: 24 plant structures; EXPRESSED DURING: 15 growth stages; CONTAINS InterPro DOMAIN/s: Stress up-regulated Nod 19 (InterPro:IPR011692); Has 27 Blast hits to 27 proteins in 10 species: Archae - 0; Bacteria - 0; Metazoa - 0; Fungi - 0; Plants - 26; Viruses - 0; Other Eukaryotes - 1 (s…
Bra006115	0	781.7	inf
Bra006751	0	10.9002	inf	AT5G58590	RANBP1; RANBP1 (RAN BINDING PROTEIN 1); protein binding
Bra001222	7.40092	0	#NAME?	AT3G06868	unknown protein
Bra001341	2.45267	0	#NAME?	AT3G08860	"alanine--glyoxylate aminotransferase, putative / beta-alanine-pyruvate aminotransferase, putative / AGT, putative"
Bra019313	0	5.09301	inf	AT4G23190	"CRK11, AT-RLK3; CRK11 (CYSTEINE-RICH RLK11); kinase/ protein kinase
Bra017905	112.744	14.2476	-2.98426	AT1G58360	"AAP1, NAT2; AAP1 (AMINO ACID PERMEASE 1); amino acid transmembrane transporter/ neutral amino acid transmembrane transporter"
Bra006178	8.45218	0	#NAME?	AT5G13080	"WRKY75, ATWRKY75; WRKY75; transcription factor"
Bra029130	0	31.8785	inf	AT5G46630	clathrin adaptor complexes medium subunit family protein
Bra001453	654.193	9.15687	-6.15872	AT3G12500	"ATHCHIB, PR3, PR-3, CHI-B, B-CHI; ATHCHIB (ARABIDOPSIS THALIANA BASIC CHITINASE); chitinase"
Bra001843	3.02264	0	#NAME?	AT3G21720	ICL; ICL (ISOCITRATE LYASE); catalytic/ isocitrate lyase
Bra038808	0	1.90351	inf	AT1G10000	nucleic acid binding / ribonuclease H
Bra019310	47.9086	0	#NAME?	AT4G23340	"oxidoreductase, 2OG-Fe(II) oxygenase family protein"
Bra023976	4.52823	59.6109	3.71856	AT1G72550	tRNA synthetase beta subunit family protein
Bra017622	0	8.6507	inf	AT4G34020	DJ-1 family protein
Bra017700	15.1181	0	#NAME?	AT4G35160	O-methyltransferase family 2 protein
Bra014652	3.07509	0	#NAME?	AT3G57020	strictosidine synthase family protein
Bra028175	118.976	90.9391	-0.387697	AT5G38420	ribulose bisphosphate carboxylase small chain 2B / RuBisCO small subunit 2B (RBCS-2B) (ATS2B)
Bra028181	118.976	90.9391	-0.387697	AT5G38430	ribulose bisphosphate carboxylase small chain 1B / RuBisCO small subunit 1B (RBCS-1B) (ATS1B)
Bra028178	118.976	90.9391	-0.387697	AT1G31150	transcription factor
Bra028180	118.976	90.9391	-0.387697	AT5G38380	FUNCTIONS IN: molecular_function unknown; INVOLVED IN: biological_process unknown; LOCATED IN: cellular_component unknown; EXPRESSED IN: 22 plant structures; EXPRESSED DURING: 14 growth stages; BEST Arabidopsis thaliana protein match is: cation efflux family protein (TAIR:AT2G04620.1); Has 90 Blast hits to 90 proteins in 28 species: Archae - 0; Bacteria - 0; Metazoa - 66; Fungi - 0; Plants - 18; …
Bra028177	118.976	90.9391	-0.387697	AT4G18905	transducin family protein / WD-40 repeat family protein
Bra028179	118.976	90.9391	-0.387697	AT5G38380	FUNCTIONS IN: molecular_function unknown; INVOLVED IN: biological_process unknown; LOCATED IN: cellular_component unknown; EXPRESSED IN: 22 plant structures; EXPRESSED DURING: 14 growth stages; BEST Arabidopsis thaliana protein match is: cation efflux family protein (TAIR:AT2G04620.1); Has 90 Blast hits to 90 proteins in 28 species: Archae - 0; Bacteria - 0; Metazoa - 66; Fungi - 0; Plants - 18; …
Bra028174	118.976	90.9391	-0.387697	AT5G38430	ribulose bisphosphate carboxylase small chain 1B / RuBisCO small subunit 1B (RBCS-1B) (ATS1B)
Bra028176	118.976	90.9391	-0.387697	AT5G13260	unknown protein
Bra028214	0	72.1623	inf	AT5G38980	unknown protein
Bra014510	544.143	3.70647	-7.1978	AT3G60140	"DIN2, SRG2, BGLU30; DIN2 (DARK INDUCIBLE 2); catalytic/ cation binding / hydrolase, hydrolyzing O-glycosyl compounds"
Bra028175	25.6153	14.2788	-0.843129	AT5G38420	ribulose bisphosphate carboxylase small chain 2B / RuBisCO small subunit 2B (RBCS-2B) (ATS2B)
Bra028181	25.6153	14.2788	-0.843129	AT5G38430	ribulose bisphosphate carboxylase small chain 1B / RuBisCO small subunit 1B (RBCS-1B) (ATS1B)
Bra028178	25.6153	14.2788	-0.843129	AT1G31150	transcription factor
Bra028180	25.6153	14.2788	-0.843129	AT5G38380	FUNCTIONS IN: molecular_function unknown; INVOLVED IN: biological_process unknown; LOCATED IN: cellular_component unknown; EXPRESSED IN: 22 plant structures; EXPRESSED DURING: 14 growth stages; BEST Arabidopsis thaliana protein match is: cation efflux family protein (TAIR:AT2G04620.1); Has 90 Blast hits to 90 proteins in 28 species: Archae - 0; Bacteria - 0; Metazoa - 66; Fungi - 0; Plants - 18; …
Bra028177	25.6153	14.2788	-0.843129	AT4G18905	transducin family protein / WD-40 repeat family protein
Bra028179	25.6153	14.2788	-0.843129	AT5G38380	FUNCTIONS IN: molecular_function unknown; INVOLVED IN: biological_process unknown; LOCATED IN: cellular_component unknown; EXPRESSED IN: 22 plant structures; EXPRESSED DURING: 14 growth stages; BEST Arabidopsis thaliana protein match is: cation efflux family protein (TAIR:AT2G04620.1); Has 90 Blast hits to 90 proteins in 28 species: Archae - 0; Bacteria - 0; Metazoa - 66; Fungi - 0; Plants - 18; …
Bra028174	25.6153	14.2788	-0.843129	AT5G38430	ribulose bisphosphate carboxylase small chain 1B / RuBisCO small subunit 1B (RBCS-1B) (ATS1B)
Bra028176	25.6153	14.2788	-0.843129	AT5G13260	unknown protein
Bra039984	7.63573	0	#NAME?	AT2G29480	"ATGSTU2, GST20; ATGSTU2 (ARABIDOPSIS THALIANA GLUTATHIONE S-TRANSFERASE TAU 2); glutathione transferase"
Bra021699	3.33173	0	#NAME?	AT2G31110	unknown protein
Bra021805	0	3.26801	inf	AT3G24900	AtRLP39; AtRLP39 (Receptor Like Protein 39); protein binding
Bra004759	163.058	11.831	-3.78475	AT2G43400	ETFQO; ETFQO (electron-transfer flavoprotein:ubiquinone oxidoreductase); catalytic/ electron carrier/ electron-transferring-flavoprotein dehydrogenase
Bra018311	177.129	18.3099	-3.2741	AT2G30490	"ATC4H, C4H, CYP73A5; C4H (CINNAMATE-4-HYDROXYLASE); trans-cinnamate 4-monooxygenase"
Bra034413	141.889	10.2024	-3.79778	AT1G35580	CINV1; CINV1 (cytosolic invertase 1); beta-fructofuranosidase
Bra034418	0	2.64722	inf	AT1G29720	protein kinase family protein
Bra029886	0	19.5471	inf	AT4G26490	"FUNCTIONS IN: molecular_function unknown; INVOLVED IN: biological_process unknown; LOCATED IN: cellular_component unknown; EXPRESSED IN: 11 plant structures; EXPRESSED DURING: 4 anthesis, LP.04 four leaves visible, F mature embryo stage, petal differentiation and expansion stage, E expanded cotyledon stage; CONTAINS InterPro DOMAIN/s: Harpin-induced 1 (InterPro:IPR010847); BEST Arabidopsis thali…
Bra004792	260.39	19.7979	-3.71726	AT2G43910	"thiol methyltransferase, putative"
Bra005525	0	8.79166	inf	AT2G33050	AtRLP26; AtRLP26 (Receptor Like Protein 26); kinase/ protein binding
Bra018471	0	4.41291	inf	AT4G12320	CYP706A6; CYP706A6; electron carrier/ heme binding / iron ion binding / monooxygenase/ oxygen binding
Bra032251	0	48.9911	inf	AT5G02800	protein kinase family protein
Bra022187	7.13798	0	#NAME?	AT3G16920	chitinase
Bra034793	1.50637	0	#NAME?	AT3G11980	"MS2, FAR2; MS2 (MALE STERILITY 2); fatty acyl-CoA reductase (alcohol-forming)/ oxidoreductase, acting on the CH-CH group of donors, NAD or NADP as acceptor"
Bra018592	4.14256	0	#NAME?	AT1G08920	"sugar transporter, putative"
Bra019684	0	5.16627	inf	AT5G59580	UGT76E1; UGT76E1 (UDP-GLUCOSYL TRANSFERASE 76E1); UDP-glycosyltransferase/ quercetin 3-O-glucosyltransferase/ quercetin 7-O-glucosyltransferase
Bra026215	0	3.99409	inf	AT1G14480	protein binding
Bra018156	11.9719	0	#NAME?	AT4G24450	"GWD3, PWD, ATGWD2; PWD (PHOSPHOGLUCAN, WATER DIKINASE); ATP binding / kinase"
Bra018154	11.9719	0	#NAME?	AT5G15150	"ATHB-3, HAT7, ATHB3; ATHB-3 (ARABIDOPSIS THALIANA HOMEOBOX 3); DNA binding / sequence-specific DNA binding / transcription factor"
Bra009739	12.3677	858.198	6.11666	AT5G24165	unknown protein
Bra024933	0	95.7309	inf	AT5G47570	unknown protein
Bra025850	0	3.55779	inf	AT1G20860	phosphate transporter family protein
Bra009764	314.028	7.75687	-5.33928	AT5G24420	glucosamine/galactosamine-6-phosphate isomerase-related
Bra024962	0	11.2356	inf	AT5G29000	myb family transcription factor
Bra039001	0	7.21701	inf	AT1G12410	"CLPR2, NCLPP2, CLP2; CLP2 (CLP PROTEASE PROTEOLYTIC SUBUNIT 2); serine-type endopeptidase"
Bra014901	0	4.65399	inf	AT4G15970	unknown protein
Bra030050	0	70.4333	inf	AT1G27435	unknown protein
Bra012057	21.0712	0	#NAME?	AT5G66190	"ATLFNR1, FNR1; FNR1 (FERREDOXIN-NADP(+)-OXIDOREDUCTASE 1); NADPH dehydrogenase/ electron transporter, transferring electrons within the cyclic electron transport pathway of photosynthesis/ electron transporter, transferring electrons within the noncyclic electron transp"
Bra003447	0	5.27486	inf	AT3G61350	SKIP4; SKIP4 (SKP1 INTERACTING PARTNER 4)
Bra039896	0	7.67489	inf	AT5G01010	EXPRESSED IN: 23 plant structures; EXPRESSED DURING: 14 growth stages; CONTAINS InterPro DOMAIN/s: GOLD (InterPro:IPR009038); Has 51 Blast hits to 51 proteins in 11 species: Archae - 0; Bacteria - 0; Metazoa - 8; Fungi - 0; Plants - 40; Viruses - 0; Other Eukaryotes - 3 (source: NCBI BLink).
Bra015204	0	1.24594	inf	AT3G47570	"leucine-rich repeat transmembrane protein kinase, putative"
Bra036394	16.433	0	#NAME?	AT4G01370	"ATMPK4, MPK4; ATMPK4 (ARABIDOPSIS THALIANA MAP KINASE 4); MAP kinase/ kinase"
Bra014992	4.77315	0	#NAME?	AT2G20810	"GAUT10, LGT4; GAUT10 (GALACTURONOSYLTRANSFERASE 10); polygalacturonate 4-alpha-galacturonosyltransferase/ transferase, transferring glycosyl groups / transferase, transferring hexosyl groups"
Bra028403	0	3.18351	inf	AT5G38280	PR5K; PR5K; kinase/ transmembrane receptor protein serine/threonine kinase
Bra016205	111.924	2.09959	-5.73627	AT1G70530	protein kinase family protein
Bra036735	0	4.46157	inf	AT1G80930	MIF4G domain-containing protein / MA3 domain-containing protein
Bra020860	0	30.7437	inf	AT4G22060	F-box family protein
Bra020845	33.5048	0	#NAME?	AT4G22517	Encodes a Protease inhibitor/seed storage/LTP family protein
Bra010895	285.47	11.9136	-4.58265	AT1G02250	anac005; anac005 (Arabidopsis NAC domain containing protein 5); transcription factor
Bra014327	0	11.1805	inf	AT2G01300	unknown protein
Bra014000	0	8.71073	inf	AT4G13850	"ATGRP2, GR-RBP2, GRP2; GR-RBP2 (GLYCINE-RICH RNA-BINDING PROTEIN 2); ATP binding / RNA binding / double-stranded DNA binding / single-stranded DNA binding
Bra040350	0	64.9494	inf	AT3G07970	QRT2; QRT2 (QUARTET 2); polygalacturonase
Bra021010	0	7.45446	inf	AT4G18425	unknown protein
Bra016662	35.0253	0	#NAME?	AT1G15380	lactoylglutathione lyase family protein / glyoxalase I family protein
Bra039070	9.28633	347.325	5.22503	AT3G27690	"LHCB2.4, LHCB2.3, LHCB2; LHCB2.3; chlorophyll binding"
Bra035944	0	10.2798	inf	AT5G61030	GR-RBP3; GR-RBP3 (glycine-rich RNA-binding protein 3); ATP binding / RNA binding
Bra035856	0	6.97622	inf	AT2G03780	translin family protein
Bra037283	6.32097	128.596	4.34656	AT2G17040	anac036; anac036 (Arabidopsis NAC domain containing protein 36); transcription factor
Bra017552	0	2.53075	inf	AT4G04540	CYSTEINE-RICH RLK (RECEPTOR-LIKE PROTEIN KINASE) 39
Bra036099	4.38552	0	#NAME?	AT5G03480	nucleic acid binding / nucleotide binding
Bra007510	286.034	8.8889	-5.00804	AT3G60140	"DIN2, SRG2, BGLU30; DIN2 (DARK INDUCIBLE 2); catalytic/ cation binding / hydrolase, hydrolyzing O-glycosyl compounds"
Bra032419	0	10.0398	inf	AT1G07910	"ATRNL, RNL; RNL (RNA LIGASE); 2',3'-cyclic-nucleotide 3'-phosphodiesterase/ RNA ligase (ATP)/ polynucleotide kinase"
Bra037352	0	5.17324	inf	AT4G00680	ADF8; ADF8 (ACTIN DEPOLYMERIZING FACTOR 8); actin binding
Bra037198	0	12.3485	inf	AT1G20480	4-coumarate--CoA ligase family protein / 4-coumaroyl-CoA synthase family protein
Bra027906	2.36273	0	#NAME?	AT1G57750	"MAH1, CYP96A15; CYP96A15 (CYTOCHROME P450 96 A1); midchain alkane hydroxylase/ oxygen binding"
Bra027596	0	16.4151	inf	AT4G01550	anac069; anac069 (Arabidopsis NAC domain containing protein 69); transcription factor
Bra027598	0	2.53675	inf	AT5G45050	"TTR1, ATWRKY16, WRKY16; TTR1; protein binding / transcription factor"
Bra035285	0	5.92729	inf	AT5G55630	KCO1, TPK1, ATKCO1, ATTPK1; ATKCO1; calcium-activated potassium channel/ ion channel/ outward rectifier potassium channel"
Bra032800	9.37128	0	#NAME?	AT2G26430	"RCY1, ATRCY1; RCY1 (ARGININE-RICH CYCLIN 1); cyclin-dependent protein kinase regulator"
Bra006951	2.94922	0	#NAME?	AT3G52820	"ATPAP22, PAP22; PAP22 (PURPLE ACID PHOSPHATASE 22); acid phosphatase/ protein serine/threonine phosphatase"
Bra007339	0	8.47897	inf	AT4G15420	PRLI-interacting factor K
Bra007416	0	3.64516	inf	AT3G58750	CSY2; CSY2 (citrate synthase 2); citrate (SI)-synthase
Bra030983	3.40418	0	#NAME?	AT1G17340	phosphoinositide phosphatase family protein
Bra031656	21.2194	178.772	3.07466	AT1G09070	"SRC2, (AT)SRC2; SRC2 (SOYBEAN GENE REGULATED BY COLD-2); protein binding"
Bra032618	5.23971	0	#NAME?	AT1G01070	nodulin MtN21 family protein
Bra002212	3.54561	0	#NAME?	AT5G19110	extracellular dermal glycoprotein-related / EDGP-related
Bra002914	38.9301	352.038	3.17677	AT5G55450	protease inhibitor/seed storage/lipid transfer protein (LTP) family protein
Bra009192	0	3.48884	inf	AT5G06410	DNAJ heat shock N-terminal domain-containing protein
Bra009191	0	3.48884	inf	AT5G06400	pentatricopeptide (PPR) repeat-containing protein
Bra009190	0	4.67196	inf	AT5G06390	FLA17; FLA17 (FASCICLIN-LIKE ARABINOGALACTAN PROTEIN 17 PRECURSOR)
Bra035349	0	12.6424	inf	AT5G36790	"phosphoglycolate phosphatase, putative"
Bra040892	0	1.85653	inf	AT3G51830	"ATG5, SAC8; ATG5; phosphatidylinositol-4,5-bisphosphate 5-phosphatase"
Heat treatment for 12h
Gene	GHA_12h	XK_12h	log2(fold_change)	A. thaliana gene	BLASTX annotations
Bra000578	3.65676	0	#NAME?	AT2G26560	"PLP2, PLA IIA, PLA2A; PLA2A (PHOSPHOLIPASE A 2A); lipase/ nutrient reservoir"
Bra000613	345.733	16.0919	-4.42525	AT5G50200	WR3; WR3 (WOUND-RESPONSIVE 3); nitrate transmembrane transporter
Bra001843	3.71136	0	#NAME?	AT3G21720	ICL; ICL (ISOCITRATE LYASE); catalytic/ isocitrate lyase
Bra001958	18.6687	0	#NAME?	AT2G16060	"GLB1, AHB1, ARATH GLB1, NSHB1, ATGLB1; AHB1 (ARABIDOPSIS HEMOGLOBIN 1); oxygen binding / oxygen transporter"
Bra002189	312.864	19.6937	-3.98973	AT5G18840	"sugar transporter, putative"
Bra002260	4.17201	0	#NAME?	AT5G19780	TUA5; TUA5; structural constituent of cytoskeleton
Bra002316	31.5981	829.94	4.7151	AT5G20630	"GLP3, GLP3A, GLP3B, ATGER3, GER3; GER3 (GERMIN 3); oxalate oxidase"
Bra004273	7.22864	0	#NAME?	AT1G67980	CCOAMT; CCoAMT; caffeoyl-CoA O-methyltransferase
Bra004383	2.59291	0	#NAME?	AT1G69480	EXS family protein / ERD1/XPR1/SYG1 family protein
Bra004833	2.14501	0	#NAME?	AT3G60120	"BGLU27; BGLU27 (BETA GLUCOSIDASE 27); catalytic/ cation binding / hydrolase, hydrolyzing O-glycosyl compounds"
Bra006098	0	25.0675	inf	AT3G25860	"LTA2, PLE2; LTA2; dihydrolipoyllysine-residue acetyltransferase"
Bra006225	0	16.9348	inf	AT5G13950	unknown protein
Bra006710	0	17.7235	inf	AT5G59540	"oxidoreductase, 2OG-Fe(II) oxygenase family protein"
Bra006711	0	17.7235	inf	AT5G59540	"oxidoreductase, 2OG-Fe(II) oxygenase family protein"
Bra007144	0	16.1382	inf	AT1G48350	ribosomal protein L18 family protein
Bra008008	5.23971	0	#NAME?	AT1G72110	unknown protein
Bra008412	0	4.13051	inf	AT5G19780	TUA5; TUA5; structural constituent of cytoskeleton
Bra009784	0	17.3341	inf	AT2G18540	cupin family protein
Bra010126	0	19.5046	inf	AT5G62840	phosphoglycerate/bisphosphoglycerate mutase family protein
Bra010496	0	3.71699	inf	AT5G11250	"disease resistance protein (TIR-NBS-LRR class), putative"
Bra010895	560.006	22.9057	-4.61166	AT1G02250	anac005; anac005 (Arabidopsis NAC domain containing protein 5); transcription factor
Bra012487	7.249	0	#NAME?	AT1G25275	unknown protein
Bra013724	2.4184	0	#NAME?	AT4G23700	"ATCHX17, CHX17; ATCHX17 (CATION/H+ EXCHANGER 17); monovalent cation:proton antiporter/ sodium:hydrogen antiporter"
Bra013787	0	3.21213	inf	AT5G41690	RNA binding / nucleic acid binding / nucleotide binding
Bra014032	0	10.2677	inf	AT1G44835	YbaK/prolyl-tRNA synthetase family protein
Bra014135	18.2821	0	#NAME?	AT1G48405	FUNCTIONS IN: molecular_function unknown; INVOLVED IN: biological_process unknown; CONTAINS InterPro DOMAIN/s: KIP1-like (InterPro:IPR011684); BEST Arabidopsis thaliana protein match is: unknown protein (TAIR:AT3G17680.1); Has 119 Blast hits to 117 proteins in 34 species: Archae - 0; Bacteria - 22; Metazoa - 7; Fungi - 8; Plants - 57; Viruses - 0; Other Eukaryotes - 25 (source: NCBI BLink).
Bra014271	0	5.58041	inf	AT1G51350	armadillo/beta-catenin repeat family protein
Bra014278	0	6.17689	inf	AT1G51200	zinc finger (AN1-like) family protein
Bra014992	22.6427	0	#NAME?	AT2G20810	"GAUT10, LGT4; GAUT10 (GALACTURONOSYLTRANSFERASE 10); polygalacturonate 4-alpha-galacturonosyltransferase/ transferase, transferring glycosyl groups / transferase, transferring hexosyl groups"
Bra015041	6.82148	0	#NAME?	AT5G60980	nuclear transport factor 2 (NTF2) family protein / RNA recognition motif (RRM)-containing protein
Bra015746	1.69553	0	#NAME?	AT4G23160	protein kinase family protein
Bra016306	10.304	0	#NAME?	AT1G27100	"FUNCTIONS IN: molecular_function unknown; INVOLVED IN: biological_process unknown; LOCATED IN: vacuole; EXPRESSED IN: 23 plant structures; EXPRESSED DURING: 13 growth stages; CONTAINS InterPro DOMAIN/s: Protein of unknown function DUF569 (InterPro:IPR007679), Actin_cross-linking (InterPro:IPR008999); BEST Arabidopsis thaliana protein match is: unknown protein (TAIR:AT1G69900.1); Has 184 Blast hi…
Bra017242	0	10.3045	inf	AT3G13680	F-box family protein
Bra017561	4.20026	0	#NAME?	AT5G46350	"WRKY8, ATWRKY8; WRKY8; transcription factor"
Bra017636	0	2.29626	inf	AT1G02110	proline-rich family protein
Bra018840	0	2.74811	inf	AT1G64255	SWIM zinc finger family protein
Bra019313	0	2.69534	inf	AT4G23190	"CRK11, AT-RLK3; CRK11 (CYSTEINE-RICH RLK11); kinase/ protein kinase"
Bra019329	7.13059	0	#NAME?	AT4G23130	"CRK5, RLK6; CRK5 (CYSTEINE-RICH RLK5); kinase"
Bra020037	229.495	7.17576	-4.99919	AT5G19380	unknown protein
Bra020092	52.7602	0	#NAME?	AT5G20230	"ATBCB, BCB; ATBCB (ARABIDOPSIS BLUE-COPPER-BINDING PROTEIN); copper ion binding / electron carrier"
Bra020360	0	4.96919	inf	AT3G01400	armadillo/beta-catenin repeat family protein
Bra020860	0	4.76128	inf	AT4G22060	F-box family protein
Bra021699	11.19	0	#NAME?	AT2G31110	unknown protein
Bra022071	0	10.9621	inf	AT5G46450	"disease resistance protein (TIR-NBS-LRR class), putative"
Bra022106	0	28.489	inf	AT5G47120	"ATBI-1, BI-1, ATBI1; ATBI1 (BAX INHIBITOR 1)"
Bra022810	11.8244	0	#NAME?	AT2G30630	unknown protein
Bra023463	0	14.5628	inf	AT5G14390	FUNCTIONS IN: molecular_function unknown; INVOLVED IN: biological_process unknown; LOCATED IN: endomembrane system; EXPRESSED IN: 19 plant structures; EXPRESSED DURING: 11 growth stages; CONTAINS InterPro DOMAIN/s: Alpha/beta hydrolase fold-1 (InterPro:IPR000073); BEST Arabidopsis thaliana protein match is: unknown protein (TAIR:AT3G01690.1); Has 2904 Blast hits to 2898 proteins in 507 species: A…
Bra023487	3.03141	0	#NAME?	AT5G14780	"FDH; FDH (FORMATE DEHYDROGENASE); NAD or NADH binding / binding / catalytic/ cofactor binding / oxidoreductase, acting on the CH-OH group of donors, NAD or NADP as acceptor"
Bra023651	0	3.84207	inf	AT5G17990	"TRP1, pat1; TRP1 (tryptophan biosynthesis 1); anthranilate phosphoribosyltransferase"
Bra023915	9.86758	0	#NAME?	AT1G74490	"protein kinase, putative"
Bra023923	0	9.39824	inf	AT4G38740	ROC1; ROC1 (ROTAMASE CYP 1); peptidyl-prolyl cis-trans isomerase
Bra024933	0	98.062	inf	AT2G18540	cupin family protein
Bra025485	74.5992	6.52121	-3.51595	AT5G41610	"ATCHX18, CHX18; ATCHX18; monovalent cation:proton antiporter/ sodium:hydrogen antiporter"
Bra025684	0	13.1611	inf	AT2G27100	SE; SE (SERRATE); DNA binding / transcription factor
Bra026167	287.202	9.49923	-4.91811	AT1G15040	glutamine amidotransferase-related
Bra026516	19.4056	0	#NAME?	AT3G25597	unknown protein
Bra026576	5.26586	325.38	5.94931	AT2G02860	"SUT2, ATSUC3, SUC3; SUT2 (SUCROSE TRANSPORTER 2); carbohydrate transmembrane transporter/ sucrose transmembrane transporter/ sucrose:hydrogen symporter/ sugar:hydrogen symporter"
Bra026577	5.26586	325.38	5.94931	AT2G02850	ARPN; ARPN (PLANTACYANIN); copper ion binding / electron carrier
Bra026684	4.7639	0	#NAME?	AT1G17180	ATGSTU25; ATGSTU25 (GLUTATHIONE S-TRANSFERASE TAU 25); glutathione transferase
Bra027397	145.364	7.51119	-4.27448	AT3G13790	"ATCWINV1, ATBFRUCT1; ATBFRUCT1; beta-fructofuranosidase/ hydrolase, hydrolyzing O-glycosyl compounds"
Bra027596	0	8.11089	inf	AT4G01550	anac069; anac069 (Arabidopsis NAC domain containing protein 69); transcription factor
Bra027598	0	1.42382	inf	AT5G45050	"TTR1, ATWRKY16, WRKY16; TTR1; protein binding / transcription factor
Bra028292	0	8.57716	inf	AT3G11100	transcription factor
Bra028816	0	12.7835	inf	AT1G56530	hydroxyproline-rich glycoprotein family protein
Bra029306	8.152	0	#NAME?	AT5G61820	FUNCTIONS IN: molecular_function unknown; INVOLVED IN: biological_process unknown; LOCATED IN: vacuole; EXPRESSED IN: 24 plant structures; EXPRESSED DURING: 15 growth stages; CONTAINS InterPro DOMAIN/s: Stress up-regulated Nod 19 (InterPro:IPR011692); Has 27 Blast hits to 27 proteins in 10 species: Archae - 0; Bacteria - 0; Metazoa - 0; Fungi - 0; Plants - 26; Viruses - 0; Other Eukaryotes - 1 (s…
Bra029888	4.49255	0	#NAME?	AT3G11000	"LOCATED IN: endomembrane system; EXPRESSED IN: 9 plant structures; EXPRESSED DURING: 6 growth stages; CONTAINS InterPro DOMAIN/s: Development and cell death domain (InterPro:IPR013989), Kelch related (InterPro:IPR013089); BEST Arabidopsis thaliana protein match is: unknown protein (TAIR:AT5G01660.1); Has 173 Blast hits to 164 proteins in 29 species: Archae - 0; Bacteria - 6; Metazoa - 2; Fungi -…
Bra030036	0	5.06127	inf	AT1G79940	ATERDJ2A; ATERDJ2A; heat shock protein binding / unfolded protein binding
Bra030526	186.861	5.55405	-5.07228	AT1G03220	"extracellular dermal glycoprotein, putative / EDGP, putative"
Bra030983	3.45562	0	#NAME?	AT1G17340	phosphoinositide phosphatase family protein
Bra031210	59.1164	927.112	3.97111	AT2G21660	"ATGRP7, CCR2, GR-RBP7, GRP7; CCR2 (COLD, CIRCADIAN RHYTHM, AND RNA BINDING 2); RNA binding / double-stranded DNA binding / single-stranded DNA binding"
Bra031215	0	2.53603	inf	AT2G21720	unknown protein
Bra033617	3.65903	0	#NAME?	AT2G02770	holo-[acyl-carrier-protein] synthase/ magnesium ion binding
Bra033768	0	7.05305	inf	AT5G01260	glycoside hydrolase starch-binding domain-containing protein
Bra033843	0	4.00722	inf	AT3G45190	SIT4 phosphatase-associated family protein
Bra034178	0	0.858455	inf	AT4G03020	transducin family protein / WD-40 repeat family protein
Bra034179	0	0.858455	inf	AT4G03030	kelch repeat-containing F-box family protein
Bra034180	0	0.858455	inf	AT4G03050	AOP3; AOP3; iron ion binding / oxidoreductase
Bra034181	0	0.858455	inf	AT4G03070	"AOP1, AOP, AOP1.1; AOP1; oxidoreductase, acting on paired donors, with incorporation or reduction of molecular oxygen, 2-oxoglutarate as one donor, and incorporation of one atom each of oxygen into both donors"
Bra034182	0	0.858455	inf	AT4G03070	"AOP1, AOP, AOP1.1; AOP1; oxidoreductase, acting on paired donors, with incorporation or reduction of molecular oxygen, 2-oxoglutarate as one donor, and incorporation of one atom each of oxygen into both donors"
Bra034183	0	0.858455	inf	AT4G03090	sequence-specific DNA binding / transcription factor
Bra034184	0	0.858455	inf	AT4G03100	"rac GTPase activating protein, putative"
Bra034185	0	0.858455	inf	AT4G03110	"RNA-binding protein, putative"
Bra034186	0	0.858455	inf	AT4G03115	binding
Bra034187	0	0.858455	inf	AT4G03120	proline-rich family protein
Bra034188	0	0.858455	inf	AT4G03130	transcription coactivator
Bra034189	0	0.858455	inf	AT4G03140	binding / catalytic/ oxidoreductase
Bra034190	0	0.858455	inf	AT4G03150	unknown protein
Bra034191	0	0.858455	inf	AT4G03190	"GRH1, ATGRH1, AFB1; GRH1 (GRR1-LIKE PROTEIN 1); auxin binding / protein binding / ubiquitin-protein ligase"
Bra034192	0	0.858455	inf	AT4G03200	catalytic
Bra034193	0	0.858455	inf	AT4G03210	"XTH9; XTH9 (XYLOGLUCAN ENDOTRANSGLUCOSYLASE/HYDROLASE 9); hydrolase, acting on glycosyl bonds / xyloglucan:xyloglucosyl transferase"
Bra034194	0	0.858455	inf	AT4G05460	F-box family protein (FBL20)
Bra034195	0	0.858455	inf	AT4G03240	"ATFH, FH; FH (FRATAXIN HOMOLOG)"
Bra034196	0	0.858455	inf	AT4G03250	homeobox-leucine zipper family protein
Bra034197	0	0.858455	inf	AT4G03260	leucine-rich repeat family protein
Bra034198	0	0.858455	inf	AT4G03270	CYCD6;1; CYCD6;1 (Cyclin D6;1); cyclin-dependent protein kinase
Bra034199	0	0.858455	inf	AT5G20030	agenet domain-containing protein
Bra034200	0	0.858455	inf	AT4G03280	"PETC, PGR1; PETC (PHOTOSYNTHETIC ELECTRON TRANSFER C); electron transporter, transferring electrons from cytochrome b6/f complex of photosystem II"
Bra034201	0	0.858455	inf	AT4G03320	tic20-IV; tic20-IV (TRANSLOCON AT THE INNER ENVELOPE MEMBraNE OF CHLOROPLASTS 20-IV)
Bra034202	0	0.858455	inf	AT4G03330	"SYP123, ATSYP123; SYP123 (SYNTAXIN OF PLANTS 123); SNAP receptor"
Bra034203	0	0.858455	inf	AT4G03110	unknown protein
Bra034204	0	0.858455	inf	AT4G03390	SRF3; SRF3 (STRUBBELIG-RECEPTOR FAMILY 3); ATP binding / kinase/ protein serine/threonine kinase
Bra034205	0	0.858455	inf	AT4G03400	"DFL2, GH3-10; DFL2 (DWARF IN LIGHT 2)"
Bra034206	0	0.858455	inf	AT4G03415	catalytic/ protein serine/threonine phosphatase
Bra034207	0	0.858455	inf	AT4G03420	unknown protein
Bra034208	0	0.858455	inf	AT4G03430	"STA1, EMB2770; EMB2770 (EMBRYO DEFECTIVE 2770); RNA splicing factor, transesterification mechanism"
Bra034209	0	0.858455	inf	AT4G03490	protein binding
Bra034210	0	0.858455	inf	AT4G03440	ankyrin repeat family protein
Bra034211	0	0.858455	inf	AT4G03440	ankyrin repeat family protein
Bra034212	0	0.858455	inf	AT4G03510	RMA1; RMA1; protein binding / ubiquitin-protein ligase/ zinc ion binding
Bra034213	0	0.858455	inf	AT3G24870	DNA binding
Bra034214	0	0.858455	inf	AT4G03520	ATHM2; ATHM2; enzyme activator
Bra034215	0	0.858455	inf	AT4G03540	integral membrane family protein
Bra034216	0	0.858455	inf	AT5G45570	Ulp1 protease family protein
Bra034217	0	0.858455	inf	AT4G03550	"ATGSL05, GSL05, ATGSL5, PMR4, GSL5; ATGSL05 (GLUCAN SYNTHASE-LIKE 5); 1,3-beta-glucan synthase/ transferase, transferring glycosyl groups"
Bra034218	0	0.858455	inf	AT4G03550	"ATGSL05, GSL05, ATGSL5, PMR4, GSL5; ATGSL05 (GLUCAN SYNTHASE-LIKE 5); 1,3-beta-glucan synthase/ transferase, transferring glycosyl groups"
Bra034219	0	0.858455	inf	AT4G03560	"ATTPC1, TPC1, ATCCH1, FOU2; ATTPC1 (TWO-PORE CHANNEL 1); calcium channel/ voltage-gated calcium channel"
Bra034220	0	0.858455	inf	AT4G03580	FUNCTIONS IN: molecular_function unknown; INVOLVED IN: biological_process unknown; LOCATED IN: cellular_component unknown; BEST Arabidopsis thaliana protein match is: cathepsin-related (TAIR:AT5G17080.1); Has 215 Blast hits to 146 proteins in 28 species: Archae - 0; Bacteria - 11; Metazoa - 101; Fungi - 14; Plants - 5; Viruses - 0; Other Eukaryotes - 84 (source: NCBI BLink).
Bra034221	0	0.858455	inf	AT3G05685	"FUNCTIONS IN: molecular_function unknown; INVOLVED IN: biological_process unknown; LOCATED IN: cellular_component unknown; CONTAINS InterPro DOMAIN/s: Cystatin-related, plant (InterPro:IPR006525); BEST Arabidopsis thaliana protein match is: unknown protein (TAIR:AT5G17090.1); Has 28 Blast hits to 26 proteins in 1 species: Archae - 0; Bacteria - 0; Metazoa - 0; Fungi - 0; Plants - 28; Viruses - 0…
Bra034373	0	8.57655	inf	AT2G27840	"HDT4, HDA13, HDT04; HDT4; histone deacetylase"
Bra034418	0	4.20049	inf	AT1G29720	protein kinase family protein
Bra034719	1.54067	0	#NAME?	AT3G12910	transcription factor
Bra035035	46.0376	0	#NAME?	AT1G78410	VQ motif-containing protein
Bra035108	0	5.71835	inf	AT1G79330	"AMC6, ATMCP2B, ATMC5; ATMC5 (ARABIDOPSIS THALIANA METACASPASE 5); cysteine-type endopeptidase"
Bra035557	195.504	0	#NAME?	AT5G55135	unknown protein
Bra035944	0	8.07225	inf	AT5G61030	GR-RBP3; GR-RBP3 (glycine-rich RNA-binding protein 3); ATP binding / RNA binding
Bra036021	34.2547	0	#NAME?	AT5G44310	late embryogenesis abundant domain-containing protein / LEA domain-containing protein
Bra036226	0	0.858455	inf	AT4G03010	leucine-rich repeat family protein
Bra036227	0	0.858455	inf	AT4G03000	protein binding / zinc ion binding
Bra036228	0	0.858455	inf	AT4G02990	mitochondrial transcription termination factor family protein / mTERF family protein
Bra036229	0	0.858455	inf	AT4G02980	ABP1, ABP; ABP1 (ENDOPLASMIC RETICULUM AUXIN BINDING PROTEIN 1); auxin binding"
Bra036230	0	0.858455	inf	AT4G03370	ubiquitin family protein
Bra036231	0	0.858455	inf	AT4G05260	ubiquitin family protein
Bra036232	0	0.858455	inf	AT4G05230	ubiquitin family protein
Bra036233	0	0.858455	inf	AT4G02940	"oxidoreductase, 2OG-Fe(II) oxygenase family protein"
Bra036234	0	0.858455	inf	AT4G02930	"elongation factor Tu, putative / EF-Tu, putative"
Bra036235	0	0.858455	inf	AT4G11550	DC1 domain-containing protein
Bra036236	0	0.858455	inf	AT2G26970	exonuclease family protein
Bra036237	0	0.858455	inf	AT4G02830	unknown protein
Bra036238	0	0.858455	inf	AT4G02810	unknown protein
Bra036239	0	0.858455	inf	AT4G02780	GA1, ABC33, ATCPS1; GA1 (GA REQUIRING 1); ent-copalyl diphosphate synthase/ magnesium ion binding"
Bra036240	0	0.858455	inf	AT4G02770	PSAD-1; PSAD-1 (photosystem I subunit D-1)
Bra036269	0	5.98195	inf	AT4G02410	lectin protein kinase family protein
Bra036735	0	5.79604	inf	AT1G80930	MIF4G domain-containing protein / MA3 domain-containing protein
Bra037198	0	10.0101	inf	AT1G20480	4-coumarate--CoA ligase family protein / 4-coumaroyl-CoA synthase family protein
Bra037251	0	29.0666	inf	AT2G17770	"ATBZIP27, FDP; ATBZIP27; transcription factor"
Bra037926	0	10.1591	inf	AT1G21060	unknown protein
Bra038033	0	8.90272	inf	AT3G13040	myb family transcription factor
Bra038302	2.90291	0	#NAME?	AT3G45060	"ATNRT2.6, NRT2.6; ATNRT2.6; nitrate transmembrane transporter
Bra038352	0	17.9608	inf	AT2G36580	"pyruvate kinase, putative"
Bra039120	126.715	3.11753	-5.34504	AT3G01420	"ALPHA-DOX1, DOX1, DIOX1; DOX1; lipoxygenase"
Bra039177	0	14.1753	inf	AT4G19190	zinc knuckle (CCHC-type) family protein
Bra039984	40.9295	0	#NAME?	AT2G29480	"ATGSTU2, GST20; ATGSTU2 (ARABIDOPSIS THALIANA GLUTATHIONE S-TRANSFERASE TAU 2); glutathione transferase"
Bra040672	0	10.3798	inf	AT5G58220	TTL; TTL (Transthyretin-Like protein); steroid binding
Heat treatment for 18h
Gene	GHA_18h	XK_18h	log2(fold_change)	A. thaliana gene	BLASTX annotations
Bra011747	0	1.33617	inf	AT4G37250	leucine-rich repeat family protein / protein kinase family protein
Bra013294	5.26087	0	#NAME?	AT5G41690	RNA binding / nucleic acid binding / nucleotide binding
Bra013787	0	3.25393	inf	AT5G41690	RNA binding / nucleic acid binding / nucleotide binding
Bra026375	0	5.13134	inf	AT4G27140	2S seed storage protein 1 / 2S albumin storage protein / NWMU1-2S albumin 1
Bra011208	0	140.871	inf	AT4G30650	hydrophobic protein, putative / low temperature and salt responsive protein, putative"
Bra038483	0	5.49559	inf	AT4G27140	2S seed storage protein 1 / 2S albumin storage protein / NWMU1-2S albumin 1
Bra028816	0	24.1217	inf	AT1G56530	hydroxyproline-rich glycoprotein family protein
Bra007985	15.0028	99.2764	2.72622	AT1G71800	"cleavage stimulation factor, putative"
Bra008135	0	1.73329	inf	AT1G74150	"FUNCTIONS IN: molecular_function unknown; INVOLVED IN: biological_process unknown; LOCATED IN: cellular_component unknown; EXPRESSED IN: 14 plant structures; EXPRESSED DURING: 6 growth stages; CONTAINS InterPro DOMAIN/s: Galactose oxidase/kelch, beta-propeller (InterPro:IPR011043), Kelch repeat type 1 (InterPro:IPR006652), Kelch repeat type 2 (InterPro:IPR011498), Kelch-type beta propeller (Inte…
Bra022006	4.11557	0	#NAME?	AT5G56940	ribosomal protein S16 family protein
Bra026659	807.047	139.09	-2.53664	AT2G01490	phytanoyl-CoA dioxygenase (PhyH) family protein
Bra036360	10.9694	144.157	3.71609	AT3G25890	"AP2 domain-containing transcription factor, putative"
Bra032981	674.57	76.4102	-3.14213	AT3G27090	"FUNCTIONS IN: molecular_function unknown; INVOLVED IN: biological_process unknown; LOCATED IN: cellular_component unknown; EXPRESSED IN: 24 plant structures; EXPRESSED DURING: 15 growth stages; CONTAINS InterPro DOMAIN/s: Development and cell death domain (InterPro:IPR013989), Kelch related (InterPro:IPR013089); BEST Arabidopsis thaliana protein match is: unknown protein (TAIR:AT5G42050.1); Has …
Bra029392	0	4.43559	inf	AT5G24150	"SQP1, SQE5; SQP1; squalene monooxygenase"
Bra029199	0	5.12647	inf	AT5G63850	AAP4; AAP4; acidic amino acid transmembrane transporter/ amino acid transmembrane transporter/ neutral amino acid transmembrane transporter/ primary active transmembrane transporter
Bra031836	10.5058	90.4041	3.10519	AT1G03100	pentatricopeptide (PPR) repeat-containing protein
Bra035631	0	2.11201	inf	AT5G56810	F-box family protein
Bra006751	0	7.01872	inf	AT5G58590	RANBP1; RANBP1 (RAN BINDING PROTEIN 1); protein binding
Bra000884	4575.14	471.781	-3.27762	AT4G02380	"SAG21, AtLEA5; SAG21 (SENESCENCE-ASSOCIATED GENE 21)"
Bra013175	2864.51	223.065	-3.68275	AT2G05540	glycine-rich protein
Bra006019	0	5.80811	inf	AT5G09330	anac082; anac082 (Arabidopsis NAC domain containing protein 82); transcription factor
Bra022920	0	12.9464	inf	AT2G25450	"2-oxoglutarate-dependent dioxygenase, putative"
Bra000578	2.77571	0	#NAME?	AT2G26560	PLP2, PLA IIA, PLA2A; PLA2A (PHOSPHOLIPASE A 2A); lipase/ nutrient reservoir"
Bra000845	0	3.72134	inf	AT4G15350	CYP705A2; CYP705A2; electron carrier/ heme binding / iron ion binding / monooxygenase/ oxygen binding
Bra001078	8.79006	220.57	4.64922	AT3G03470	CYP89A9; CYP89A9; electron carrier/ heme binding / iron ion binding / monooxygenase/ oxygen binding
Bra001121	0	48.2843	inf	AT3G04720	"PR4, HEL, PR-4; PR4 (PATHOGENESIS-RELATED 4); chitin binding"
Bra013123	0	17.4963	inf	AT2G14580	ATPRB1; ATPRB1
Bra038808	0	0.985784	inf	AT1G10000	nucleic acid binding / ribonuclease H
Bra017622	0	23.3956	inf	AT4G34020	DJ-1 family protein
Bra014716	63.5972	1305.38	4.35937	AT3G55970	"oxidoreductase, 2OG-Fe(II) oxygenase family protein"
Bra039782	0	17.0146	inf	AT3G53430	60S ribosomal protein L12 (RPL12B)
Bra025612	36.7558	398.766	3.4395	AT2G04690	cellular repressor of E1A-stimulated genes (CREG) family
Bra017243	0	6.68982	inf	AT4G19210	"ATRLI2, RLI2; ATRLI2; transporter"
Bra017113	453.893	31.084	-3.86811	AT2G38530	"LTP2, LP2; LTP2 (LIPID TRANSFER PROTEIN 2); lipid binding"
Bra037630	7.00574	0	#NAME?	AT2G44840	"ATERF13, EREBP, ERF13; ERF13 (ETHYLENE-RESPONSIVE ELEMENT BINDING FACTOR 13); DNA binding / transcription factor"
Bra032712	3.0886	0	#NAME?	AT4G13540	unknown protein
Bra025434	0	4.46704	inf	AT5G37890	"seven in absentia (SINA) protein, putative"
Bra030337	0	4.91632	inf	AT5G40240	nodulin MtN21 family protein
Bra039984	17.137	0	#NAME?	AT2G29480	"ATGSTU2, GST20; ATGSTU2 (ARABIDOPSIS THALIANA GLUTATHIONE S-TRANSFERASE TAU 2); glutathione transferase"
Bra021699	5.92747	0	#NAME?	AT2G31110	unknown protein
Bra017184	143.66	16.6778	-3.10665	AT4G02850	phenazine biosynthesis PhzC/PhzF family protein
Bra004769	0	39.8344	inf	AT1G47540	"trypsin inhibitor, putative"
Bra034440	16.6873	0	#NAME?	AT2G32260	"ATCCT1, CCT1; cholinephosphate cytidylyltransferase, putative / phosphorylcholine transferase, putative / CTP:phosphocholine cytidylyltransferase, putative"
Bra039956	9.58196	0	#NAME?	AT3G22490	"late embryogenesis abundant protein, putative / LEA protein, putative"
Bra005331	0	2.0905	inf	AT2G35540	DNAJ heat shock N-terminal domain-containing protein
Bra018480	0	5.93789	inf	AT3G53750	ACT3; ACT3 (actin 3); structural constituent of cytoskeleton
Bra032251	0	28.353	inf	AT5G02800	protein kinase family protein
Bra025082	68.1577	353.818	2.37606	AT5G23150	HUA2; HUA2 (ENHANCER OF AG-4 2); transcription factor
Bra026201	3.07141	0	#NAME?	AT2G02040	"ATPTR2-B, NTR1, PTR2-B, PTR2, ATPTR2; PTR2 (PEPTIDE TRANSPORTER 2); dipeptide transporter/ high affinity oligopeptide transporter/ nitrate transmembrane transporter/ peptide transporter/ transporter/ tripeptide transporter"
Bra025684	0	12.4296	inf	AT2G27100	SE; SE (SERRATE); DNA binding / transcription factor
Bra037493	7.37951	0	#NAME?	AT5G39740	"OLI7, RPL5B; 60S ribosomal protein L5 (RPL5B)"
Bra015212	0	6.2413	inf	AT5G03340	"cell division cycle protein 48, putative / CDC48, putative"
Bra015041	6.94951	0	#NAME?	AT5G60980	nuclear transport factor 2 (NTF2) family protein / RNA recognition motif (RRM)-containing protein
Bra030050	0	20.058	inf	AT1G27435	unknown protein
Bra012057	23.3157	0	#NAME?	AT5G66190	"ATLFNR1, FNR1; FNR1 (FERREDOXIN-NADP(+)-OXIDOREDUCTASE 1); NADPH dehydrogenase/ electron transporter, transferring electrons within the cyclic electron transport pathway of photosynthesis/ electron transporter, transferring electrons within the noncyclic electron transp"
Bra003499	1035.31	128.5	-3.01022	AT3G62410	"CP12-2, CP12; CP12-2; protein binding"
Bra003807	263.918	28.0872	-3.23211	AT1G74310	"ATHSP101, HSP101, HOT1; ATHSP101 (ARABIDOPSIS THALIANA HEAT SHOCK PROTEIN 101); ATP binding / ATPase/ nucleoside-triphosphatase/ nucleotide binding / protein binding"
Bra015746	1.87652	0	#NAME?	AT4G23160	protein kinase family protein
Bra035108	0	2.54978	inf	AT1G79330	"AMC6, ATMCP2B, ATMC5; ATMC5 (ARABIDOPSIS THALIANA METACASPASE 5); cysteine-type endopeptidase"
Bra039909	0	11.1468	inf	AT2G18010	auxin-responsive family protein
Bra028399	3.46371	0	#NAME?	AT5G38100	methyltransferase-related
Bra003716	35.62	220.877	2.63248	AT1G76520	auxin efflux carrier family protein
Bra016205	99.5911	11.5009	-3.11427	AT1G70530	protein kinase family protein
Bra016206	99.5911	11.5009	-3.11427	AT1G70530	protein kinase family protein
Bra016016	20.0162	0	#NAME?	AT1G73120	unknown protein
Bra035067	11.0497	125.589	3.50663	AT1G78830	curculin-like (mannose-binding) lectin family protein
Bra014278	0	8.87598	inf	AT1G51200	zinc finger (AN1-like) family protein
Bra038053	0	6.88982	inf	AT4G15960	catalytic/ epoxide hydrolase
Bra038054	0	6.88982	inf	AT1G54030	"GDSL-motif lipase, putative"
Bra036735	0	3.42683	inf	AT1G80930	MIF4G domain-containing protein / MA3 domain-containing protein
Bra021073	0	7.58156	inf	AT4G34440	protein kinase family protein
Bra030526	153.08	21.5983	-2.8253	AT1G03220	"extracellular dermal glycoprotein, putative / EDGP, putative"
Bra032314	81.3836	476.888	2.55084	AT1G29380	FUNCTIONS IN: molecular_function unknown; INVOLVED IN: biological_process unknown; LOCATED IN: endomembrane system; CONTAINS InterPro DOMAIN/s: X8 (InterPro:IPR012946); BEST Arabidopsis thaliana protein match is: unknown protein (TAIR:AT2G30933.2); Has 72661 Blast hits to 25630 proteins in 1396 species: Archae - 121; Bacteria - 23698; Metazoa - 22516; Fungi - 4473; Plants - 9059; Viruses - 967; O…
Bra032315	81.3836	476.888	2.55084	AT1G29390	COR314-TM2; COR314-TM2
Bra032871	12.1302	0	#NAME?	AT2G29880	unknown protein
Bra032867	0	10.2237	inf	AT1G72370	"P40, AP40, RP40, RPSAA; P40; structural constituent of ribosome"
Bra007144	0	15.6357	inf	AT1G48350	ribosomal protein L18 family protein
Bra007278	0	1.23947	inf	AT3G56870	unknown protein
Bra031210	70.3946	511.917	2.86237	AT2G21660	"ATGRP7, CCR2, GR-RBP7, GRP7; CCR2 (COLD, CIRCADIAN RHYTHM, AND RNA BINDING 2); RNA binding / double-stranded DNA binding / single-stranded DNA binding"
Bra031149	0	1.81044	inf	AT1G33240	"AT-GTL1, AT-GTL2; AT-GTL1 (GT2-LIKE 1); DNA binding / transcription factor"
Bra032582	24.8314	0	#NAME?	AT5G27770	60S ribosomal protein L22 (RPL22C)
Bra035844	9.96793	102.615	3.36381	AT5G63450	CYP94B1; CYP94B1; electron carrier/ heme binding / iron ion binding / monooxygenase/ oxygen binding
Bra036642	133.889	15.2178	-3.13721	AT1G12520	ATCCS; ATCCS (COPPER CHAPERONE FOR SOD1); superoxide dismutase/ superoxide dismutase copper chaperone
Bra027623	0	7.57858	inf	AT1G74090	"SOT18, ATSOT18, ATST5B; SOT18 (DESULFO-GLUCOSINOLATE SULFOTRANSFERASE 18); 3-methylthiopropyl-desulfoglucosinolate sulfotransferase/ 4-methylthiobutyl-desulfoglucosinolate sulfotransferase/ 5-methylthiopentyl-desulfoglucosinolate sulfotransferase/ 7-methylthioheptyl-desulfogluco"
Bra027987	25.915	154.23	2.57323	AT5G03610	GDSL-motif lipase/hydrolase family protein
Bra027596	0	12.0381	inf	AT4G01550	anac069; anac069 (Arabidopsis NAC domain containing protein 69); transcription factor
Bra035285	0	7.34638	inf	AT5G55630	"KCO1, TPK1, ATKCO1, ATTPK1; ATKCO1; calcium-activated potassium channel/ ion channel/ outward rectifier potassium channel"
Bra032800	5.09438	0	#NAME?	AT2G26430	"RCY1, ATRCY1; RCY1 (ARGININE-RICH CYCLIN 1); cyclin-dependent protein kinase regulator"
Bra007213	1.62837	0	#NAME?	AT3G56060	glucose-methanol-choline (GMC) oxidoreductase family protein
Bra007612	3.3613	0	#NAME?	AT3G61530	PANB2; PANB2; 3-methyl-2-oxobutanoate hydroxymethyltransferase
Bra002666	12.02	0	#NAME?	AT5G58240	"bis(5'-adenosyl)-triphosphatase, putative"
Bra040897	0	2.13544	inf	AT3G57420	unknown protein
Bra040933	72.0539	8.41132	-3.09867	AT5G52920	"PKP1, PKP-BETA1, PKP2; PKP-BETA1 (PLASTIDIC PYRUVATE KINASE BETA SUBUNIT 1); pyruvate kinase"
