# Supplementary material for: Comparative Transcriptome Analysis Reveals Heat-Responsive Genes in Chinese Cabbage (Brassica rapa ssp. chinensis)
Source: Front Plant Sci. 2016 Jun 28;7:939. doi: 10.3389/fpls.2016.00939 (PMC4923122; doi:10.3389/fpls.2016.00939)
Supplement: Table S3 — GO enrichment of differentially expressed genes at different heat treatment stages. [file DataSheet3.XLSX]

## Sheet: Sheet1
Table S3 GO enrichment of differentially expressed genes at different heat treatment stages.
CK
GO term	Ontology	Description	Number in input list	Number in BG/Ref	p-value	FDR
GO:0050896	P	response to stimulus	22	4057	7.2e-05	0.0041
GO:0006950	P	response to stress	16	2320	5.7e-05	0.0041
GO:0051716	P	cellular response to stimulus	8	840	0.00065	0.025
GO:0019748	P	secondary metabolic process	6	489	0.00089	0.025
GO:0003824	F	catalytic activity	36	9638	0.00054	0.034
1h
GO term	Ontology	Description	Number in input list	Number in BG/Ref	p-value	FDR
GO:0051707	P	response to other organism	16	599	8.3e-06	0.0013
GO:0019748	P	secondary metabolic process	15	489	3.2e-06	0.0013
GO:0019760	P	glucosinolate metabolic process	6	62	8.4e-06	0.0013
GO:0016143	P	S-glycoside metabolic process	6	62	8.4e-06	0.0013
GO:0019757	P	glycosinolate metabolic process	6	62	8.4e-06	0.0013
GO:0009607	P	response to biotic stimulus	16	638	1.8e-05	0.0022
GO:0006950	P	response to stress	35	2320	2.2e-05	0.0024
GO:0050896	P	response to stimulus	51	4057	3.5e-05	0.0034
GO:0009611	P	response to wounding	8	197	0.00011	0.009
GO:0016137	P	glycoside metabolic process	6	104	0.00013	0.0098
GO:0051704	P	multi-organism process	16	776	0.00017	0.011
GO:0003824	F	catalytic activity	107	9638	1.2e-07	3.5e-05
GO:0004888	F	transmembrane receptor activity	7	171	0.00027	0.039
GO:0005773	C	vacuole	11	383	0.00012	0.016
6h
GO term	Ontology	Description	Number in input list	Number in BG/Ref	p-value	FDR
GO:0003824	F	catalytic activity	54	9638	3e-07	3.9e-05
GO:0016740	F	transferase activity	22	3321	0.00033	0.021
GO:0042578	F	phosphoric ester hydrolase activity	7	481	0.00067	0.029
GO:0016301	F	kinase activity	13	1641	0.0013	0.043
12h
GO term	Ontology	Description	Number in input list	Number in BG/Ref	p-value	FDR
GO:0016265	P	death	7	286	0.00014	0.026
GO:0008219	P	cell death	7	286	0.00014	0.026
GO:0006950	P	response to stress	21	2320	0.00021	0.027
GO:0045087	P	innate immune response	7	347	0.00043	0.033
GO:0012501	P	programmed cell death	6	244	0.0004	0.033
GO:0006955	P	immune response	7	367	0.00059	0.033
GO:0002376	P	immune system process	7	368	0.0006	0.033
18h
GO term	Ontology	Description	Number in input list	Number in BG/Ref	p-value	FDR
GO:0042254	P	ribosome biogenesis	5	241	0.00028	0.046
GO:0022613	P	ribonucleoprotein complex biogenesis	5	253	0.00035	0.046
