# Supplementary material for: Comparative Transcriptome Analysis Reveals Heat-Responsive Genes in Chinese Cabbage (Brassica rapa ssp. chinensis)
Source: Front Plant Sci. 2016 Jun 28;7:939. doi: 10.3389/fpls.2016.00939 (PMC4923122; doi:10.3389/fpls.2016.00939)
Supplement: Table S4 — Differentially expressed genes of GO enrichment terms during the heat treatment. [file DataSheet4.XLSX]

## Sheet: Sheet1
Table S4 Differentially expressed genes of GO enrichment terms during the heat treatment.
GO:0050896 Response to stimulus
	CK-S	CK-T	1h-S	1h-T	6h-S	6h-T	12h-S	12h-T	18h-S	18h-T
Bra002316	68.2996	795.789	193.349	2832.21			31.5981	829.94			AT5G20630	GLP3, oxalate oxidase
Bra025530	0	7.18145									AT5G02790	n2-1 protein, putative
Bra022160	902.249	45.2555									AT3G16460	jacalin lectin family protein
Bra005390	170.224	20.4327	66.4009	3.78941							AT2G34810	FAD-binding domain-containing protein
Bra029874	1.85037	0									AT5G05170	cellulose synthase/ transferase, transferring glycosyl groups
Bra015818	0	3.22846									AT5G15690	response to cadmium ion;
Bra008311	3.77038	0	6.95134	0							AT1G77510	protein disulfide isomerase
Bra026536	7.67066	0									AT2G03760	brassinosteroid sulfotransferase/ sulfotransferase
Bra024155	3.2924	0									AT4G29210	gamma-glutamyltransferase/ glutathione gamma-glutamylcysteinyltransferase
Bra036206	0	1.01347									AT1G59620	CW9; CW9; ATP binding
Bra022161	902.249	45.2555	1161.23	5.13288							AT3G16470	JASMONATE RESPONSIVE 1
Bra034104	0	12.2147	0	9.5365							AT5G02500	HSC70-1 (HEAT SHOCK COGNATE PROTEIN 70-1); ATP binding
Bra034154	48.8713	400.785	26.9671	204.578							AT3G10920	metal ion binding / superoxide dismutase
Bra009148	111.549	3.04074									AT1G13080	CYP71B2; electron carrier/ heme binding / iron ion binding / monooxygenase/ oxygen binding
Bra036158	4.51665	0									AT5G48850	ATSDI1 (SULPHUR DEFICIENCY-INDUCED 1); binding
Bra016002	350.454	16									AT1G73260	trypsin and protease inhibitor family protein / Kunitz family protein
Bra011821	106.876	9.72847									AT4G39950	CYP79B2; electron carrier/ heme binding / iron ion binding / monooxygenase/ oxygen binding
Bra028403	0	4.74118	0	2.25616							AT5G38280	PR5K; PR5K; kinase/ transmembrane receptor protein serine/threonine kinase
Bra014534	133.029	0									AT2G43510	ATTI1; ATTI1; serine-type endopeptidase inhibitor
Bra010627	236.346	21.0875									AT4G37990	ELI3-2 (ELICITOR-ACTIVATED GENE 3-2); aryl-alcohol dehydrogenase/ mannitol dehydrogenase
Bra025684	0	10.1911	0	9.16143			0	13.1611	0	12.4296	AT2G27100	SE; SE (SERRATE); DNA binding / transcription factor
Bra040672	0	25.7841					0	10.3798			AT5G58220	TTL; TTL (Transthyretin-Like protein); steroid binding
Bra027598					0	2.53675	0	1.42382			AT5G45050	TTR1, ATWRKY16, WRKY16; TTR1; protein binding / transcription factor
Bra036394					16.433	0					AT4G01370	ATMPK4, MPK4; ATMPK4 (ARABIDOPSIS THALIANA MAP KINASE 4); MAP kinase/ kinase
Bra005525					0	2.53675					AT2G33050	AtRLP26; AtRLP26 (Receptor Like Protein 26); kinase/ protein binding
Bra034161					0	2.48632					AT3G05650	AtRLP32; AtRLP32 (Receptor Like Protein 32); kinase/ protein binding
Bra020470					643.644	13.0973					AT5G24770	VSP2, ATVSP2; VSP2 (VEGETATIVE STORAGE PROTEIN 2); acid phosphatase
Bra019313			0	3.9562	0	5.09301	0	2.69534			AT4G23190	CRK11, AT-RLK3; CRK11 (CYSTEINE-RICH RLK11); kinase/ protein kinase
Bra023845					199.392	19.0602					AT3G22200	POP2 (POLLEN-PISTIL INCOMPATIBILITY 2); 4-aminobutyrate transaminase/ 4-aminobutyrate:pyruvate transaminase
Bra018311			82.4013	9.72074	177.129	18.3099					AT2G30490	C4H (CINNAMATE-4-HYDROXYLASE); trans-cinnamate 4-monooxygenase
Bra040520					14.9833	294.268					AT2G30490	C4H (CINNAMATE-4-HYDROXYLASE); trans-cinnamate 4-monooxygenase
Bra014000			0	8.69698	0	8.71073					AT4G13850	GR-RBP2 (GLYCINE-RICH RNA-BINDING PROTEIN 2); ATP binding / RNA binding / double-stranded DNA binding
Bra006178					8.45218	0					AT5G13080	WRKY75, ATWRKY75; WRKY75; transcription factor
Bra021805					0	3.26801					AT3G24900	AtRLP39; AtRLP39 (Receptor Like Protein 39); protein binding
Bra001453			837.153	5.53106	654.193	9.15687					AT3G12500	ATHCHIB, PR3, PR-3, CHI-B, B-CHI; ATHCHIB (ARABIDOPSIS THALIANA BASIC CHITINASE); chitinase
Bra032800			5.51799	0	9.37128	0			5.09438	0	AT2G26430	RCY1, ATRCY1; RCY1 (ARGININE-RICH CYCLIN 1); cyclin-dependent protein kinase regulator
Bra003447					0	5.27486					AT3G61350	SKIP4; SKIP4 (SKP1 INTERACTING PARTNER 4)
Bra034218			35.4432	0			0	0.858455			AT4G03550	1,3-beta-glucan synthase/ transferase, transferring glycosyl groups
Bra000548			12.8591	0							AT2G24850	TAT3, TAT; TAT3 (TYROSINE AMINOTRANSFERASE 3); L-tyrosine:2-oxoglutarate aminotransferase/ transaminase
Bra022997			3.10514	0							AT2G34930	disease resistance family protein
Bra008056			0	2.68875							AT5G17680	disease resistance protein (TIR-NBS-LRR class), putative
Bra022069			0	10.0793							AT5G46520	ATP binding / nucleoside-triphosphatase/ nucleotide binding / protein binding / transmembrane receptor
Bra009261			49.7461	0							AT5G07460	oxidoreductase, acting on sulfur group of donors, disulfide as acceptor / peptide-methionine-(S)-S-oxide reductase
Bra007937			266.815	21.9054							AT1G70700	JAZ9, TIFY7; TIFY7
Bra022071			0	4.19554			0	10.9621			AT5G46450	disease resistance protein (TIR-NBS-LRR class), putative
Bra021175			18.7557	0							AT3G16400	ATMLP-470, NSP1, ATNSP1; NSP1 (NITRILE SPECIFIER PROTEIN 1)
Bra035179			148.78	16.117							AT1G15690	AVP1, ATAVP3, AVP-3; AVP1; ATPase/ hydrogen-translocating pyrophosphatase
Bra022815			200.475	23.6795							AT2G30860	ATGSTF9 (GLUTATHIONE S-TRANSFERASE PHI 9); copper ion binding / glutathione binding / glutathione peroxidase/ glutathione transferase
Bra020675			26.142	0							AT5G48850	ATSDI1; ATSDI1 (SULPHUR DEFICIENCY-INDUCED 1); binding
Bra013589			17.9158	0							AT3G43790	ZIFL2; ZIFL2 (ZINC INDUCED FACILITATOR-like 2); carbohydrate transmembrane transporter/ sugar:hydrogen symporter
Bra034095			14.2659	181.765							AT1G74670	gibberellin-responsive protein, putative
Bra008053			0	14.0307							AT1G72840	ATP binding / protein binding / transmembrane receptor
Bra034200			35.4432	0			0	0.858455			AT4G03280	electron transporter, transferring electrons from cytochrome b6/f complex of photosystem II
Bra038569			13.3533	0							AT1G61120	TPS04, GES; TPS04 (TERPENE SYNTHASE 04); (E,E)-geranyllinalool synthase
Bra006212			86.6037	7.26686							AT5G13740	carbohydrate transmembrane transporter/ sugar:hydrogen symporter/ tetracycline:hydrogen antiporter
Bra025756			273.747	7.82752							AT1G19670	ATCLH1, CORI1, ATHCOR1; ATCLH1 (ARABIDOPSIS THALIANA CORONATINE-INDUCED PROTEIN 1); chlorophyllase
Bra034214			35.4432	0			0	0.858455			AT4G03520	ATHM2; ATHM2; enzyme activator
Bra031393			0	12.7782							AT1G61800	GPT2; GPT2; antiporter/ glucose-6-phosphate transmembrane transporter
Bra005937			3.83027	0							AT5G07470	oxidoreductase, acting on sulfur group of donors, disulfide as acceptor / peptide-methionine-(S)-S-oxide reductase
Bra004838			1.78254	0							AT5G24540	BGLU31; BGLU31 (BETA GLUCOSIDASE 31); catalytic/ cation binding / hydrolase, hydrolyzing O-glycosyl compounds
Bra014643			0	6.53219							AT3G57240	BG3; BG3 (BETA-1,3-GLUCANASE 3); cellulase/ hydrolase, hydrolyzing O-glycosyl compounds
Bra036239			35.4432	0			0	0.858455			AT4G02780	GA1, ABC33, ATCPS1; GA1 (GA REQUIRING 1); ent-copalyl diphosphate synthase/ magnesium ion binding
Bra034195			35.4432	0							AT4G03240	ATFH, FH; FH (FRATAXIN HOMOLOG)
Bra025730			4.10318	0							AT1G19320	pathogenesis-related thaumatin family protein
Bra022535			157.471	2.26663							AT3G45140	LOX2, ATLOX2; LOX2 (LIPOXYGENASE 2); lipoxygenase
Bra001729			135.149	8.71374							AT3G18990	VRN1 (REDUCED VERNALIZATION RESPONSE 1); transcription repressor
Bra034191			35.4432	0			0	0.858455			AT4G03190	GRH1 (GRR1-LIKE PROTEIN 1); auxin binding / protein binding / ubiquitin-protein ligase
Bra034208			35.4432	0			0	0.858455			AT4G03430	EMB2770 (EMBRYO DEFECTIVE 2770); RNA splicing factor, transesterification mechanism
Bra034205			35.4432	0			0	0.858455			AT4G03400	DFL2 (DWARF IN LIGHT 2)
Bra015656			7.74297	56.0412							AT1G77760	NIA1 (NITRATE REDUCTASE 1); nitrate reductase
Bra000059			42.98	0							AT2G38380	peroxidase 22 (PER22) (P22) (PRXEA) / basic peroxidase E
Bra008055			0	29.2089							AT4G09420	disease resistance protein (TIR-NBS class), putative
Bra036843			19.8061	0							AT3G50980	XERO1; XERO1 (DEHYDRIN XERO 1)
Bra013714			287.389	4.34167							AT4G23600	CORI3 (CORONATINE INDUCED 1); cystathionine beta-lyase/ transaminase
GO:0050896 Response to stress
	CK-S	CK-T	1h-S	1h-T	6h-S	6h-T	12h-S	12h-T	18h-S	18h-T
Bra002316	68.2996	795.789	193.349	2832.21	654.193	9.15687	31.5981	829.94			AT5G20630	GER3 (GERMIN 3); oxalate oxidase
Bra036206	0	1.01347									AT1G59620	CW9; CW9; ATP binding
Bra022160	902.249	45.2555									AT3G16460	jacalin lectin family protein
Bra014534	133.029	0									AT2G43510	ATTI1; ATTI1; serine-type endopeptidase inhibitor
Bra022161	902.249	45.2555	1161.23	5.13288							AT3G16470	JASMONATE RESPONSIVE 1
Bra005390	170.224	20.4327	66.4009	3.78941							AT2G34810	FAD-binding domain-containing protein
Bra026536	7.67066	0									AT2G03760	ST, ATST1, RAR047, ST1; ST; brassinosteroid sulfotransferase/ sulfotransferase
Bra034154	48.8713	400.785	26.9671	204.578							AT3G10920	MSD1 (MANGANESE SUPEROXIDE DISMUTASE 1); metal ion binding / superoxide dismutase
Bra010627	236.346	21.0875									AT4G37990	ELI3-2 (ELICITOR-ACTIVATED GENE 3-2); aryl-alcohol dehydrogenase/ mannitol dehydrogenase
Bra034104	0	12.2147	0	9.5365							AT5G02500	HSC70-1, HSP70-1, AT-HSC70-1, HSC70; HSC70-1 (HEAT SHOCK COGNATE PROTEIN 70-1); ATP binding
Bra009148	111.549	3.04074									AT1G13080	CYP71B2 (CYTOCHROME P450 71B2); electron carrier/ heme binding / iron ion binding / monooxygenase/ oxygen binding
Bra036158	4.51665	0	6.90289	0							AT5G48850	ATSDI1; ATSDI1 (SULPHUR DEFICIENCY-INDUCED 1); binding
Bra016002	350.454	16									AT1G73260	trypsin and protease inhibitor family protein / Kunitz family protein
Bra029874	1.85037	0									AT5G05170	CEV1 (CONSTITUTIVE EXPRESSION OF VSP 1); cellulose synthase/ transferase, transferring glycosyl groups
Bra008311	3.77038	0	6.95134	0							AT1G77510	ATPDIL1-2 (PDI-LIKE 1-2); protein disulfide isomerase
Bra011821	106.876	9.72847									AT4G39950	CYP79B2; electron carrier/ heme binding / iron ion binding / monooxygenase/ oxygen binding
Bra034941			223.219	7.63524							AT4G31500	CYP83B1 (CYTOCHROME P450 MONOOXYGENASE 83B1); oxidoreductase, acting on paired donors
Bra002316			193.349	2832.21							AT5G20630	GLP3, GLP3A, GLP3B, ATGER3, GER3; GER3 (GERMIN 3); oxalate oxidase
Bra000548			12.8591	0							AT2G24850	TAT3 (TYROSINE AMINOTRANSFERASE 3); L-tyrosine:2-oxoglutarate aminotransferase/ transaminase
Bra022997			3.10514	0							AT2G34930	disease resistance family protein
Bra022069			0	10.0793							AT5G46520	ATP binding / nucleoside-triphosphatase/ nucleotide binding / protein binding / transmembrane receptor
Bra009261			49.7461	0							AT5G07460	PMSR2 (PEPTIDEMETHIONINE SULFOXIDE REDUCTASE 2); oxidoreductase
Bra022071			0	4.19554			0	10.9621			AT5G46450	disease resistance protein (TIR-NBS-LRR class), putative
Bra005390			66.4009	3.78941							AT2G34810	FAD-binding domain-containing protein
Bra032800			5.51799	0	9.37128	0					AT2G26430	RCY1, ATRCY1; RCY1 (ARGININE-RICH CYCLIN 1); cyclin-dependent protein kinase regulator
Bra035179			148.78	16.117							AT1G15690	AVP1, ATAVP3, AVP-3; AVP1; ATPase/ hydrogen-translocating pyrophosphatase
Bra022815			200.475	23.6795							AT2G30860	ATGSTF9 (GLUTATHIONE S-TRANSFERASE PHI 9); copper ion binding / glutathione binding / glutathione peroxidase/ glutathione transferase
Bra020675			26.142	0							AT5G48850	ATSDI1; ATSDI1 (SULPHUR DEFICIENCY-INDUCED 1); binding
Bra008311			6.95134	0							AT1G77510	ATPDIL1-2, PDI6, ATPDI6; ATPDIL1-2 (PDI-LIKE 1-2); protein disulfide isomerase
Bra008053			0	14.0307							AT1G72840	ATP binding / protein binding / transmembrane receptor
Bra008056			0	2.68875							AT5G17680	disease resistance protein (TIR-NBS-LRR class), putative
Bra018311			82.4013	9.72074	177.129	18.3099					AT2G30490	ATC4H, C4H, CYP73A5; C4H (CINNAMATE-4-HYDROXYLASE); trans-cinnamate 4-monooxygenase
Bra038569			13.3533	0							AT1G61120	TPS04, GES; TPS04 (TERPENE SYNTHASE 04); (E,E)-geranyllinalool synthase
Bra025756			273.747	7.82752							AT1G19670	ATCLH1 (ARABIDOPSIS THALIANA CORONATINE-INDUCED PROTEIN 1); chlorophyllase
Bra034214			35.4432	0			0	0.858455			AT4G03520	ATHM2; ATHM2; enzyme activator
Bra005937			3.83027	0							AT5G07470	PMSR3 (PEPTIDEMETHIONINE SULFOXIDE REDUCTASE 3); oxidoreductase
Bra034154			26.9671	204.578							AT3G10920	MSD1 (MANGANESE SUPEROXIDE DISMUTASE 1); metal ion binding / superoxide dismutase
Bra034195			35.4432	0			0	0.858455			AT4G03240	ATFH, FH; FH (FRATAXIN HOMOLOG)
Bra034104			0	9.5365							AT5G02500	HSC70-1 (HEAT SHOCK COGNATE PROTEIN 70-1); ATP binding
Bra022161			1161.23	5.13288							AT3G16470	JASMONATE RESPONSIVE 1
Bra004058			66.6219	3.87044							AT3G45140	LOX2, ATLOX2; LOX2 (LIPOXYGENASE 2); lipoxygenase
Bra014000			0	8.69698							AT4G13850	GR-RBP2 (GLYCINE-RICH RNA-BINDING PROTEIN 2); ATP binding / RNA binding / double-stranded DNA binding
Bra001729			135.149	8.71374							AT3G18990	VRN1, REM39; VRN1 (REDUCED VERNALIZATION RESPONSE 1); transcription repressor
Bra034218			35.4432	0			0	0.858455			AT4G03550	ATGSL05 (GLUCAN SYNTHASE-LIKE 5); 1,3-beta-glucan synthase/ transferase, transferring glycosyl groups
Bra034208			35.4432	0			0	0.858455			AT4G03430	STA1, EMB2770; EMB2770 (EMBRYO DEFECTIVE 2770); RNA splicing factor, transesterification mechanism
Bra000059			42.98	0							AT2G38380	peroxidase 22 (PER22) (P22) (PRXEA) / basic peroxidase E
Bra008055			0	29.2089							AT4G09420	disease resistance protein (TIR-NBS class), putative
Bra019313			0	3.9562	0	5.09301	0	2.69534	5.09438	0	AT4G23190	CRK11, AT-RLK3; CRK11 (CYSTEINE-RICH RLK11); kinase/ protein kinase
Bra036843			19.8061	0							AT3G50980	XERO1; XERO1 (DEHYDRIN XERO 1)
Bra013714			287.389	4.34167							AT4G23600	CORI3, JR2; CORI3 (CORONATINE INDUCED 1); cystathionine beta-lyase/ transaminase
Bra001453			837.153	5.53106							AT3G12500	ATHCHIB (ARABIDOPSIS THALIANA BASIC CHITINASE); chitinase
Bra032800					9.37128	0					AT2G26430	RCY1 (ARGININE-RICH CYCLIN 1); cyclin-dependent protein kinase regulator
Bra005525					0	8.79166					AT2G33050	AtRLP26; AtRLP26 (Receptor Like Protein 26); kinase/ protein binding
Bra017905					112.744	14.2476					AT1G58360	AAP1 (AMINO ACID PERMEASE 1); amino acid transmembrane transporter/ neutral amino acid transmembrane transporter
Bra028175					118.976	90.9391					AT5G38420	ribulose bisphosphate carboxylase small chain 2B / RuBisCO small subunit 2B (RBCS-2B) (ATS2B)
Bra018311					177.129	18.3099					AT2G30490	C4H (CINNAMATE-4-HYDROXYLASE); trans-cinnamate 4-monooxygenase
Bra039070					9.28633	347.325					AT3G27690	LHCB2.4, LHCB2.3, LHCB2; LHCB2.3; chlorophyll binding
Bra021805					0	3.26801					AT3G24900	AtRLP39 (Receptor Like Protein 39); protein binding
Bra036394					16.433	0					AT4G01370	ATMPK4 (ARABIDOPSIS THALIANA MAP KINASE 4); MAP kinase/ kinase
Bra020470					643.644	13.0973					AT5G24770	VSP2 (VEGETATIVE STORAGE PROTEIN 2); acid phosphatase
Bra040520					14.9833	294.268					AT3G01500	CA1 (CARBONIC ANHYDRASE 1); carbonate dehydratase/ zinc ion binding
Bra014000					0	8.71073					AT4G13850	GR-RBP2 (GLYCINE-RICH RNA-BINDING PROTEIN 2); ATP binding / RNA binding / double-stranded DNA binding
Bra006178					8.45218	0					AT5G13080	WRKY75, ATWRKY75; WRKY75; transcription factor
Bra002914					38.9301	352.038					AT5G55450	protease inhibitor/seed storage/lipid transfer protein (LTP) family protein
Bra028403					0	3.18351					AT5G38280	PR5K; PR5K; kinase/ transmembrane receptor protein serine/threonine kinase
Bra003447					0	5.27486					AT3G61350	SKIP4; SKIP4 (SKP1 INTERACTING PARTNER 4)
Bra027598					0	2.53675	0	1.42382			AT5G45050	TTR1, ATWRKY16, WRKY16; TTR1; protein binding / transcription factor
Bra034161					0	2.48632					AT3G05650	AtRLP32; AtRLP32 (Receptor Like Protein 32); kinase/ protein binding
Bra001453					654.193	9.15687					AT3G12500	ATHCHIB (ARABIDOPSIS THALIANA BASIC CHITINASE); chitinase
Bra037283					6.32097	128.596					AT2G17040	anac036; anac036 (Arabidopsis NAC domain containing protein 36); transcription factor
Bra028181					25.6153	14.2788					AT5G38430	ribulose bisphosphate carboxylase small chain 1B / RuBisCO small subunit 1B (RBCS-1B) (ATS1B)
Bra004759					163.058	11.831					AT2G43400	ETFQO (electron-transfer flavoprotein:ubiquinone oxidoreductase); catalytic/ electron carrier/ electron-transferring-flavoprotein dehydrogenase
Bra019313			0	3.9562	0	5.09301					AT4G23190	CRK11, AT-RLK3; CRK11 (CYSTEINE-RICH RLK11); kinase/ protein kinase
GO:0012501 Programmed cell death
	CK-S	CK-T	1h-S	1h-T	6h-S	6h-T	12h-S	12h-T	18h-S	18h-T
Bra035108	0.204172	10.7259	0	4.97612	0.0702979	13.017	0	5.71835	0	2.54978	AT1G79330	ATMC5
Bra010496	0.0324262	0.310733	0	0.681894	0.0359995	1.32869	0	3.71699	0.561912	2.65768	AT5G11250	TIR-NBS-LRR
Bra022071							0	10.9621			AT5G46450	TIR-NBS-LRR
Bra022106	0.672311	17.6527	0.284399	132.966	0.252672	35.4484	0	28.489	13.7743	54.9116	AT5G47120	BAX INHIBITOR 1
Bra000578	0.0796405	0			0.273502	0	3.65676	0	2.77571	0	AT2G26560	PHOSPHOLIPASE A 2A
GO:0045087 Immune system process
	CK-S	CK-T	1h-S	1h-T	6h-S	6h-T	12h-S	12h-T	18h-S	18h-T
Bra031210					0.0359995	1.32869	59.1164	927.112			AT2G21660	RNA binding
Bra010496	0.0324262	0.310733	0	0.681894	0.0359995	1.32869	0	3.71699	0.561912	2.65768	AT5G11250	TIR-NBS-LRR
Bra000578	0.0796405	0			0.273502	0	3.65676	0	2.77571	0	AT2G26560	PHOSPHOLIPASE A 2A
Bra022071							0	10.9621			AT5G46450	disease resistance protein
Bra034218							0	0.858455			AT4G03550	1,3-beta-glucan synthase
Bra019313	0.147926	4.20164	0	3.9562	0	5.09301	0	2.69534			AT4G23190	kinase/ protein kinase
GO:0042254 Ribosome biogenesis
	CK-S	CK-T	1h-S	1h-T	6h-S	6h-T	12h-S	12h-T	18h-S	18h-T
Bra037493									7.37951	0	AT5G39740	60S ribosomal protein L5
Bra032867									0	10.2237	AT1G72370	structural constituent of ribosome
Bra007144									0	15.6357	AT1G48350	ribosomal protein L18
Bra022006									4.11557	0	AT5G56940	ribosomal protein S16
Bra039782	0	19.306	0	9.92025	0.521702	41.0029	0	8.74461	0	17.0146	AT3G53430	60S ribosomal protein L12
GO:0022613 Ribonucleo protein complex biogenesis
	CK-S	CK-T	1h-S	1h-T	6h-S	6h-T	12h-S	12h-T	18h-S	18h-T
Bra037493									7.37951	0	AT5G39740	OLI7, RPL5B; 60S ribosomal protein L5 (RPL5B)
Bra032867									0	10.2237	AT1G72370	P40, AP40, RP40, RPSAA; P40; structural constituent of ribosome
Bra007144			0	7.11999			0	16.1382	0	15.6357	AT1G48350	ribosomal protein L18 family protein
Bra022006									4.11557	0	AT5G56940	ribosomal protein S16 family protein
Bra039782	0	19.306	0	9.92025					0	17.0146	AT3G53430	60S ribosomal protein L12 (RPL12B)
	CK-S	CK-T	1h-S	1h-T	6h-S	6h-T	12h-S	12h-T	18h-S	18h-T
Bra009148	111.549	3.04074	43.1078	0.0651341	6.91082	0.633387	0.0661711	0.825321	0	0.140649	AT1G13080	CYP71B2
Bra010598	161.367	3.58132	92.8786	0.0684887	35.4453	2.20803	8.4267	23.6642	1.56441	0.510709		CYP81F4
Bra011821	106.876	9.72847	15.3368	0.469286	4.674	0.759854	2.52813	4.10623	1.05832	0.198308	AT4G39950	CYP79B2
Bra034941	1122.25	128.365	223.219	7.63524	96.4442	27.649	131.695	52.1586	65.4988	35.8403		CYP83B1
Bra032090			11.4003	0								CYP81G1
Bra009100	1.21204	0.538118	4.75367	0	1.26385	0	0	0.153728			AT5G05260	CYP79A2
Bra033626	0.0660475	0.315849	0	2.03402	0	1.00128	0.0771369	1.01751	0	0.481768	AT4G32170	CYP96A2
Bra011759	157.412	5.36097			63.8813	1.8381	4.47507	7.85063	3.97395	1.36708		CYP81F4
Bra035812	0	2.05926	0.131461	3.60399	1.13443	3.80773	1.06438	3.9038	0.977147	6.80466		CYP705A22
Bra018471	0.496625	4.38038	0	2.10175	0	4.41291						CYP706A6
Bra035844	-0.729722	0	-0.209842	-3.55575	-0.39494	-1.97571	0.317211	0	3.31729	6.6811		CYP91B1
Bra001078									8.79006	220.57		CYP89A9
Bra000845	2.54049	0.93939	0		0.694374	0.590101	0.146004	3.09841	0	3.72134		CYP705A2
Bra034104	0	12.2147	0	9.5365							AT1G79940	HSC70-1
Bra030036	0	10.1761	0	3.11332								HSP
Bra006089			0	21.8675							AT1G01010	NAC001
Bra010895			0	0	285.47	11.9136						NAC005
Bra037283	60.4019	79.7539	29.6014	173.194	6.32097	128.596	3.63852	59.9771	6.1258	15.0947		NAC036
Bra027596	0	11.9456	0	4.47563	0	16.4151	0	8.11089	0	12.0381	AT4G01550	NAC069
Bra006019	0	1.08558	0	1.03481					0	2.53807		NAC082
Bra015372			0	4.28087							AT4G24240	WRKY7
Bra017561	0.556095	0	0.116264	0	0.85937	0	4.20026	0	3.55257	2.05627		WRKY8
Bra006178	11.2367	1.24368	6.57891	0.98866	8.45218	0	89.1654	2.07257				WRKY75
Bra023909	0	7888.01	197.891	21688.3	136.045	6411.57	158.293	4486.94				PSBTN
Bra035533			0	127.221			0	22.6256	8.69463	20.862	AT2G06520	PSBX
Bra036240			35.4432	0			0	0.858455				PSAD-1
Bra034200	26.6977	29.8543					35.7539	41.5483				Cyt b6/f

## Sheet: Sheet2
		CK-S	CK-T	1h-S	1h-T	6h-S	6h-T	12h-S	12h-T	18h-S	18h-T
Bra020550	A02:24076925-24100626	2289.31	170.329	0	0	0	0	0	0	0	0	AT5G26650	AGL36; AGL36 (AGAMOUS-LIKE 36); DNA binding / transcription factor
Bra016205	A07:22156697-22166469	79.3416	6.60936	0	0	0	0	0	0	0	0	AT1G70530	protein kinase family protein
Bra034154	A01:24728092-24729504	48.8713	400.785	0	0	0	0	0	0	0	0	AT3G10920	MSD1 (MANGANESE SUPEROXIDE DISMUTASE 1); metal ion binding / superoxide dismutase"
Bra002316	A10:10421264-10421900	68.2996	795.789	193.349	2832.21	188.291	1359.35	31.5981	829.94	32.6535	59.7607	AT5G20630	"GLP3, GER3 (GERMIN 3); oxalate oxidase"
Bra029392	A02:24910380-24915789	3.47885	54.4211	0	0	0	0	0	0	0	0	AT5G24150	"SQP1, SQE5; SQP1; squalene monooxygenase"
Bra032942	A02:21711461-21715498	4.92898	98.7241	0	0	0	0	0	0	0	0	AT3G26700	protein kinase family protein
Bra001086	A03:14681548-14682658	0	20.6573	0	0	0	0	0	0	0	0	AT1G06190	"ATP binding / ATPase, coupled to transmembrane movement of ions, phosphorylative mechanism"
Bra005331	A05:4874757-4876335	0	1.67158	0	0.647179	0	0	0	0	0	0	AT2G35540	DNAJ heat shock N-terminal domain-containing protein
Bra025684	A06:6987801-6988347	0	10.1911	0	9.16143	0	0	0	0	0	0	AT2G27100	SE; SE (SERRATE); DNA binding / transcription factor
Bra030036	A07:9244273-9246610	0	10.1761	0	0	0	0	0	0	0	0	AT1G79940	heat shock protein binding / unfolded protein binding
Bra028403	A07:13782882-13784950	0	4.74118	0	0	0	0	0	0	0	0	AT5G38280	PR5K; PR5K; kinase/ transmembrane receptor protein serine/threonine kinase
Bra003501	A07:16774794-16777119	0	2.16168	0	0.485177	0	0.539966	0	0	0	0	AT3G62600	ATERDJ3B; ATERDJ3B; heat shock protein binding / unfolded protein binding
Bra020987	A08:9942317-9944408	0	6.8513	0	0	0	0	0	0	0	0	AT1G17260	"AHA10; AHA10 (Autoinhibited H(+)-ATPase isoform 10); ATPase/ ATPase, coupled to transmembrane movement of ions, phosphorylative mechanism / cation-transporting ATPase"
Bra023915	A01:20157162-20160531	7.86374	0	0	0	0	0	0	0	0	0	AT1G74490	"protein kinase, putative"
Bra020140	A02:4192904-4199902	1.71992	0	0.434479	0.0521059	0	0	0	0	0.496567	0.0821888	AT5G20960	" AAO1 (ARABIDOPSIS ALDEHYDE OXIDASE 1); aldehyde oxidase/ indole-3-acetaldehyde oxidase"
Bra008311	A02:13630847-13633652	3.77038	0	6.95134	0	0	0	0	0	0	0	AT1G77510	"ATPDIL1-2, PDI6, ATPDI6; ATPDIL1-2 (PDI-LIKE 1-2); protein disulfide isomerase"
Bra012353	A07:10512406-10513163	7.97698	0	1.76939	1.9984	0	0	0	0	0	0	AT1G22990	heavy-metal-associated domain-containing protein / copper chaperone (CCH)-related
Bra003923	A07:19054790-19055951	19.3121	0	0	0	0	0	0	0	0	0	AT1G71480	nuclear transport factor 2 (NTF2) family protein
Bra022161	A05:20131069-20135854	902.249	45.2555	1161.23	5.13288	0	0	0	0	0	0	AT3G16470	JASMONATE RESPONSIVE 1
Bra013714	A01:7360843-7362949	0	0	287.389	4.34167	0	0	0	0	0	0	AT4G23600	JASMONIC ACID RESPONSIVE 2
Bra007937	A02:10973763-10976437	0	0	266.815	21.9054	0	0	0	0	0	0	AT1G70700	"JAZ9, TIFY7; TIFY7"
Bra016193	A07:22232630-22235434	0	0	187.803	25.5709	0	0	0	0	0	0	AT1G70700	"JAZ9, TIFY7; TIFY7"
Bra016205	A07:22156695-22166469	0	0	100.408	1.61385	0	0	0	0	0	0	AT1G70530	protein kinase family protein
Bra038432	A08:8835377-8843153	0	0	99.0477	2.165	0	0	0	0	0	0	AT1G31710	"copper amine oxidase, putative"
Bra034154	A01:24728070-24729548	0	0	26.9671	204.578	0	0	0	0	0	0	AT3G10920	MANGANESE SUPEROXIDE DISMUTASE 1
Bra006711	A03:4741972-4743430	0	0	0	5.99729	0	0	0	0	0	0	AT5G59540	"oxidoreductase, 2OG-Fe(II) oxygenase family protein"
Bra019313	A03:25066740-25070437	0.147926	4.20164	0	3.9562	0	0	0	2.69534			AT4G23190	"CRK11, AT-RLK3; CRK11 (CYSTEINE-RICH RLK11); kinase/ protein kinase"
Bra034418	A05:13845706-13850938	0	0	0	3.10727	0	0	0	0	0	0	AT1G29720	protein kinase family protein
Bra032251	A05:12444575-12444902	0	0	0	26.138	0	0	1.73606	47.3854	0	0	AT5G02800	protein kinase family protein
Bra019843	A06:4064843-4067953	0	0	0	1.29736	0	0	0	0	0	0	AT4G21380	ARK3; ARK3 (A. THALIANA RECEPTOR KINASE 3); kinase/ transmembrane receptor protein serine/threonine kinase
Bra024962	A06:23347434-23351059	0	0	0	3.66069	0	0	0	0	0	0	AT5G29000	myb family transcription factor
Bra030036	A07:9244378-9246680	0	0	0	3.11332	0	0	0	0	0	0	AT1G79940	ATERDJ2A; ATERDJ2A; heat shock protein binding / unfolded protein binding
Bra028403	A07:13782885-13784950	0	0	0	3.11332	0	0	0	0	0	0	AT5G38280	PR5K; PR5K; kinase/ transmembrane receptor protein serine/threonine kinase
Bra017552	A09:12772188-12774748	0	0	0	3.1522	0	0	0	0	0	0	AT4G04540	protein kinase family protein
Bra029522	A09:17946520-17948702	0	0	0	9.00056	0	0	0	0	0	0	AT3G28040	"leucine-rich repeat transmembrane protein kinase, putative"
Bra036269	A09:954296-956221	0	0	0	8.32871	0	0	0	0	0	0	AT4G02410	lectin protein kinase family protein
Bra001377	A03:16092888-16093296	119.096	17.5732	677.094	38.3603	295.957	16.7623	505.979	16.2113	0	0	AT5G05090	myb family transcription factor
Bra002700	A10:8230056-8231481	0	0	0	23.7738	0	0	0	0	0	0	AT2G36070	ATTIM44-2; ATTIM44-2; protein-transmembrane transporting ATPase
Bra008302	A02:13602527-13603741	0	0	2.86879	0	0	0	0.372582	0.597861	0.105463	0	AT1G77330	"1-aminocyclopropane-1-carboxylate oxidase, putative / ACC oxidase, putative"
Bra000059	A03:9127403-9129415	0	0	42.98	0	0	0	0	0	0	0	AT2G38380	peroxidase 22 (PER22) (P22) (PRXEA) / basic peroxidase E
Bra000045	A03:9021982-9024777	0	0	8.57416	0	0	0	1.28673	1.45529	0	0	AT2G38240	"oxidoreductase, 2OG-Fe(II) oxygenase family protein"
Bra034182	A09:1070514-1361511	0	0	35.4432	0	0	0	0	0	0	0	AT4G03070	"AOP1, AOP, AOP1.1; AOP1; oxidoreductase, acting on paired donors, with incorporation or reduction of molecular oxygen, 2-oxoglutarate as one donor, and incorporation of one atom each of oxygen into both donors"
Bra036233	A09:1070514-1361511	0	0	35.4432	0	0	0	0	0	0	0	AT4G02940	"oxidoreductase, 2OG-Fe(II) oxygenase family protein"
Bra034181	A09:1070514-1361511	0	0	35.4432	0	0	0	0	0	0	0	AT4G03070	"AOP1, AOP, AOP1.1; AOP1; oxidoreductase, acting on paired donors, with incorporation or reduction of molecular oxygen, 2-oxoglutarate as one donor, and incorporation of one atom each of oxygen into both donors"
Bra032362	A09:22225165-22225747	0	0	11.3525	0	0	0	14.1878	3.85209	0	0	AT1G30135	"JAZ8, TIFY5A; JAZ8 (JASMONATE-ZIM-DOMAIN PROTEIN 8)"
Bra016205	A07:22156695-22166469	0	0	100.408	1.61385	111.924	2.09959	0	0	0	0	AT1G70530	protein kinase family protein
Bra026293	A01:9984217-9988183	0	0	0	1.26345	0	1.83954	0	0.589963	0	0	AT4G28000	ATP binding / ATPase/ nucleoside-triphosphatase/ nucleotide binding
Bra034161	A01:24681534-24684102	0	0	0	0	0	2.48632	0	0.8175	0	0	AT3G05650	AtRLP32; AtRLP32 (Receptor Like Protein 32); kinase/ protein binding
Bra029316	A02:25358814-25360647	0	0	0	0	0	3.33681	0	0	0	0	AT5G61550	protein kinase family protein
Bra019313	A03:25066740-25070437	0.147926	4.20164	0	0	0	5.09301	0	2.69534	0	0	AT4G23190	kinase/ protein kinase
Bra034418	A05:13848589-13850938	0	0	0	0	0	2.64722			0	0	AT1G29720	protein kinase family protein
Bra032251	A05:12444575-12444902	0	18.9711	0	0	0	48.9911	1.73606	47.3854	0	0	AT5G02800	protein kinase family protein
Bra015204	A07:3805517-3808632	0.449279	2.13076	0	0	0	1.24594	0	1.00999	0	0	AT3G47570	"leucine-rich repeat transmembrane protein kinase, putative"
Bra028403	A07:13783021-13784950	0	0	0	0	0	3.18351	0	0	0	0	AT5G38280	PR5K; PR5K; kinase/ transmembrane receptor protein serine/threonine kinase
Bra027598	A09:12120027-12127698	0	0.529631	0	0	0	2.53675	0	1.42382	0	0	AT5G45050	ATWRKY16, WRKY16
Bra009192	A10:14886209-14890895	0	0	0	0	0	3.48884	0	0	0	0	AT5G06410	DNAJ heat shock N-terminal domain-containing protein
Bra019310	A03:25078619-25079177	0	0	0	0	47.9086	0	0	0	0	0	AT4G23340	"oxidoreductase, 2OG-Fe(II) oxygenase family protein"
Bra036394	A07:4384328-4384963	0	0	0	0	16.433	0	0	0	0	0	AT4G01370	"ATMPK4, MPK4; ATMPK4 (ARABIDOPSIS THALIANA MAP KINASE 4); MAP kinase/ kinase"
Bra002316	A10:10421264-10421900	68.2996	795.789	193.349	2832.21	0	0	31.5981	829.94	0	0	AT5G20630	"GLP3, GLP3A, GLP3B, ATGER3, GER3; GER3 (GERMIN 3); oxalate oxidase"
Bra038352	A02:10047776-10049749	0	0	0	0	0	0	0	17.9608	0	0	AT2G36580	"pyruvate kinase, putative"
Bra019313	A03:25066740-25070437	0	0	0	0	0	0	0	2.69534	0	0	AT4G23190	"CRK11, AT-RLK3; CRK11 (CYSTEINE-RICH RLK11); kinase/ protein kinase"
Bra034418	A05:13846799-13850938	0	0	0	0	0	0	0	4.20049	0	0	AT1G29720	protein kinase family protein
Bra038033	A06:14033-15771	0	0	0	0	0	0	0	8.90272	0	0	AT3G13040	myb family transcription factor
Bra025684	A06:6987801-6988347	0	0	0	9.16143	0	0	0	13.1611	0	0	AT2G27100	SE; SE (SERRATE); DNA binding / transcription factor
Bra036269	A09:954346-956193	0.112279	0.220049	0	0	0	0	0	5.98195	0	0	AT4G02410	lectin protein kinase family protein
Bra034183	A09:1073215-1361511	3694.43	4605.91	0	0	0	0	0	0.858455	0	0	AT4G03090	sequence-specific DNA binding / transcription factor
Bra034189	A09:1073215-1361511	6.68181	8.38118	0	0	0	0	0	0.858455	0	0	AT4G03140	binding / catalytic/ oxidoreductase
Bra034182	A09:1073215-1361511	6.55316	9.20424	0	0	0	0	0	0.858455	0	0	AT4G03070	AOP1, AOP, AOP1.1; AOP1; oxidoreductase, acting on paired donors, with incorporation or reduction of molecular oxygen, 2-oxoglutarate as one donor, and incorporation of one atom each of oxygen into both donors
Bra028292	A10:4692318-4693299	0	0	0	0	0	0	0	8.57716	0	0	AT3G11100	transcription factor
Bra023915	A01:20157162-20160530	0	0	10.277	0.236437	0	0	9.86758	0	0	0	AT1G74490	"protein kinase, putative"
Bra015746	A07:24334692-24338778	0.110486	0	0	0	0	0	1.69553	0	0	0	AT4G23160	protein kinase family protein
Bra003807	A07:18442662-18445750	3.74358	2.09787	109.233	65.7438	0	0	145.61	16.1024	263.918	28.0872	AT1G74310	"ATHSP101, HSP101, HOT1; ATHSP101 (ARABIDOPSIS THALIANA HEAT SHOCK PROTEIN 101); ATP binding / ATPase/ nucleoside-triphosphatase/ nucleotide binding / protein binding"
Bra036642	A09:6320197-6325864	0	0	0	0	0	0	0	0	133.889	15.2178	AT1G12520	ATCCS; ATCCS (COPPER CHAPERONE FOR SOD1); superoxide dismutase/ superoxide dismutase copper chaperone
Bra016205	A07:22149754-22166469	0	0	0	0	0	0	0	0	99.5911	11.5009	AT1G70530	protein kinase family protein
Bra016206	A07:22149754-22166469	0	0	0	0	0	0	0	0	99.5911	11.5009	AT1G70530	protein kinase family protein
Bra025082	A06:23984723-23986910	0	0	0	0	0	0	0	0	68.1577	353.818	AT5G23150	HUA2; HUA2 (ENHANCER OF AG-4 2); transcription factor
Bra036360	A02:21201331-21202815	0	0	0	0	0	0	0	0	10.9694	144.157	AT3G25890	"AP2 domain-containing transcription factor, putative"
Bra011747	A01:758417-760797	4.57104	2.09175	0	0	0	0	0.232843	0.540504	0	1.33617	AT4G37250	leucine-rich repeat family protein / protein kinase family protein
Bra022920	A03:7768292-7769612	0	0	0	0	0	0	0	0	0	12.9464	AT2G25450	"2-oxoglutarate-dependent dioxygenase, putative"
Bra005331	A05:4874757-4876335	0	0	0	0	0	0	0	0	0	2.0905	AT2G35540	DNAJ heat shock N-terminal domain-containing protein
Bra032251	A05:12444575-12444902	0	0	0	0	0	0	0	0	0	28.353	AT5G02800	protein kinase family protein
Bra025684	A06:6987801-6988347	0	0	0	0	0	0	0	0	0	12.4296	AT2G27100	SE; SE (SERRATE); DNA binding / transcription factor
Bra021073	A08:9243809-9248671	0	0	0	0	0	0	0	0	0	7.58156	AT4G34440	protein kinase family protein
Bra031149	A09:34038912-34041686	0	0	0	0	0	0	0	0	0	1.81044	AT1G33240	"AT-GTL1, AT-GTL2; AT-GTL1 (GT2-LIKE 1); DNA binding / transcription factor"
Bra015746	A07:24334692-24338778	0	0	0.432876	0	0	0	0	0	1.87652	0	AT4G23160	protein kinase family protein
Bra032800	A09:23869842-23876064	0	0	5.51799	0	0	0	0	0	5.09438	0	AT2G26430	cyclin-dependent protein kinase regulator

## Sheet: Sheet3
		CK-S	CK-T	1h-S	1h-T	6h-S	6h-T	12h-S	12h-T	18h-S	18h-T
Bra020550	A02:24076925-24100626	2289.31	170.329	NA								AT5G26650	AGL36; AGL36 (AGAMOUS-LIKE 36); DNA binding / transcription factor
Bra016205	A07:22156697-22166469	79.3416	6.60936	NA								AT1G70530	protein kinase family protein
Bra034154	A01:24728092-24729504	48.8713	400.785	NA								AT3G10920	MSD1 (MANGANESE SUPEROXIDE DISMUTASE 1); metal ion binding / superoxide dismutase"
Bra002316	A10:10421264-10421900	68.2996	795.789	193.349	2832.21	188.291	1359.35	31.5981	829.94	32.6535	59.7607	AT5G20630	"GLP3, GER3 (GERMIN 3); oxalate oxidase"
Bra029392	A02:24910380-24915789	3.47885	54.4211	NA								AT5G24150	"SQP1, SQE5; SQP1; squalene monooxygenase"
Bra032942	A02:21711461-21715498	4.92898	98.7241	NA								AT3G26700	protein kinase family protein
Bra001086	A03:14681548-14682658	0	20.6573	NA								AT1G06190	"ATP binding / ATPase, coupled to transmembrane movement of ions, phosphorylative mechanism"
Bra005331	A05:4874757-4876335	0	1.67158	0	0.647179							AT2G35540	DNAJ heat shock N-terminal domain-containing protein
Bra025684	A06:6987801-6988347	0	10.1911	0	9.16143							AT2G27100	SE; SE (SERRATE); DNA binding / transcription factor
Bra030036	A07:9244273-9246610	0	10.1761	NA								AT1G79940	heat shock protein binding / unfolded protein binding
Bra028403	A07:13782882-13784950	0	4.74118	NA								AT5G38280	PR5K; PR5K; kinase/ transmembrane receptor protein serine/threonine kinase
Bra003501	A07:16774794-16777119	0	2.16168	0	0.485177	0	0.539966					AT3G62600	ATERDJ3B; ATERDJ3B; heat shock protein binding / unfolded protein binding
Bra020987	A08:9942317-9944408	0	6.8513	NA								AT1G17260	"AHA10; AHA10 (Autoinhibited H(+)-ATPase isoform 10); ATPase/ ATPase, coupled to transmembrane movement of ions, phosphorylative mechanism / cation-transporting ATPase"
Bra023915	A01:20157162-20160531	7.86374	0	NA								AT1G74490	"protein kinase, putative"
Bra020140	A02:4192904-4199902	1.71992	0	0.434479	0.0521059					0.496567	0.0821888	AT5G20960	" AAO1 (ARABIDOPSIS ALDEHYDE OXIDASE 1); aldehyde oxidase/ indole-3-acetaldehyde oxidase"
Bra008311	A02:13630847-13633652	3.77038	0	6.95134	0							AT1G77510	"ATPDIL1-2, PDI6, ATPDI6; ATPDIL1-2 (PDI-LIKE 1-2); protein disulfide isomerase"
Bra012353	A07:10512406-10513163	7.97698	0	1.76939	1.9984							AT1G22990	heavy-metal-associated domain-containing protein / copper chaperone (CCH)-related
Bra003923	A07:19054790-19055951	19.3121	0	NA								AT1G71480	nuclear transport factor 2 (NTF2) family protein
Bra022161	A05:20131069-20135854	902.249	45.2555	1161.23	5.13288							AT3G16470	JASMONATE RESPONSIVE 1
Bra013714	A01:7360843-7362949			287.389	4.34167							AT4G23600	JASMONIC ACID RESPONSIVE 2
Bra016205	A07:22156695-22166469			100.408	1.61385							AT1G70530	protein kinase family protein
Bra038432	A08:8835377-8843153			99.0477	2.165							AT1G31710	"copper amine oxidase, putative"
Bra007937	A02:10973763-10976437			266.815	21.9054							AT1G70700	"JAZ9, TIFY7; TIFY7"
Bra016193	A07:22232630-22235434			187.803	25.5709							AT1G70700	"JAZ9, TIFY7; TIFY7"
Bra034154	A01:24728070-24729548			26.9671	204.578							AT3G10920	MANGANESE SUPEROXIDE DISMUTASE 1
Bra006711	A03:4741972-4743430			0	5.99729							AT5G59540	"oxidoreductase, 2OG-Fe(II) oxygenase family protein"
Bra019313	A03:25066740-25070437	0.147926	4.20164	0	3.9562			0	2.69534			AT4G23190	"CRK11, AT-RLK3; CRK11 (CYSTEINE-RICH RLK11); kinase/ protein kinase"
Bra034418	A05:13845706-13850938			0	3.10727							AT1G29720	protein kinase family protein
Bra032251	A05:12444575-12444902			0	26.138			1.73606	47.3854			AT5G02800	protein kinase family protein
Bra019843	A06:4064843-4067953			0	1.29736							AT4G21380	ARK3; ARK3 (A. THALIANA RECEPTOR KINASE 3); kinase/ transmembrane receptor protein serine/threonine kinase
Bra024962	A06:23347434-23351059			0	3.66069							AT5G29000	myb family transcription factor
Bra030036	A07:9244378-9246680			0	3.11332							AT1G79940	ATERDJ2A; ATERDJ2A; heat shock protein binding / unfolded protein binding
Bra028403	A07:13782885-13784950			0	3.11332							AT5G38280	PR5K; PR5K; kinase/ transmembrane receptor protein serine/threonine kinase
Bra017552	A09:12772188-12774748			0	3.1522							AT4G04540	protein kinase family protein
Bra029522	A09:17946520-17948702			0	9.00056							AT3G28040	"leucine-rich repeat transmembrane protein kinase, putative"
Bra036269	A09:954296-956221			0	8.32871							AT4G02410	lectin protein kinase family protein
Bra001377	A03:16092888-16093296	119.096	17.5732	677.094	38.3603	295.957	16.7623	505.979	16.2113			AT5G05090	myb family transcription factor
Bra002700	A10:8230056-8231481			0	23.7738							AT2G36070	ATTIM44-2; ATTIM44-2; protein-transmembrane transporting ATPase
Bra008302	A02:13602527-13603741			2.86879	0			0.372582	0.597861	0.105463	0	AT1G77330	"1-aminocyclopropane-1-carboxylate oxidase, putative / ACC oxidase, putative"
Bra000059	A03:9127403-9129415			42.98	0							AT2G38380	peroxidase 22 (PER22) (P22) (PRXEA) / basic peroxidase E
Bra000045	A03:9021982-9024777			8.57416	0			1.28673	1.45529			AT2G38240	"oxidoreductase, 2OG-Fe(II) oxygenase family protein"
Bra034182	A09:1070514-1361511			35.4432	0							AT4G03070	"AOP1, AOP, AOP1.1; AOP1; oxidoreductase, acting on paired donors, with incorporation or reduction of molecular oxygen, 2-oxoglutarate as one donor, and incorporation of one atom each of oxygen into both donors"
Bra036233	A09:1070514-1361511			35.4432	0							AT4G02940	"oxidoreductase, 2OG-Fe(II) oxygenase family protein"
Bra034181	A09:1070514-1361511			35.4432	0							AT4G03070	"AOP1, AOP, AOP1.1; AOP1; oxidoreductase, acting on paired donors, with incorporation or reduction of molecular oxygen, 2-oxoglutarate as one donor, and incorporation of one atom each of oxygen into both donors"
Bra032362	A09:22225165-22225747			11.3525	0			14.1878	3.85209			AT1G30135	"JAZ8, TIFY5A; JAZ8 (JASMONATE-ZIM-DOMAIN PROTEIN 8)"
Bra016205	A07:22156695-22166469			100.408	1.61385	111.924	2.09959					AT1G70530	protein kinase family protein
Bra026293	A01:9984217-9988183			0	1.26345	0	1.83954	0	0.589963			AT4G28000	ATP binding / ATPase/ nucleoside-triphosphatase/ nucleotide binding
Bra034161	A01:24681534-24684102			NA		0	2.48632	0	0.8175			AT3G05650	AtRLP32; AtRLP32 (Receptor Like Protein 32); kinase/ protein binding
Bra029316	A02:25358814-25360647			NA		0	3.33681	0	0			AT5G61550	protein kinase family protein
Bra019313	A03:25066740-25070437	0.147926	4.20164	NA		0	5.09301	0	2.69534			AT4G23190	kinase/ protein kinase
Bra034418	A05:13848589-13850938			NA		0	2.64722					AT1G29720	protein kinase family protein
Bra032251	A05:12444575-12444902	0	18.9711	NA		0	48.9911	1.73606	47.3854			AT5G02800	protein kinase family protein
Bra015204	A07:3805517-3808632	0.449279	2.13076			0	1.24594	0	1.00999			AT3G47570	"leucine-rich repeat transmembrane protein kinase, putative"
Bra028403	A07:13783021-13784950					0	3.18351					AT5G38280	PR5K; PR5K; kinase/ transmembrane receptor protein serine/threonine kinase
Bra027598	A09:12120027-12127698	0	0.529631			0	2.53675	0	1.42382			AT5G45050	ATWRKY16, WRKY16
Bra009192	A10:14886209-14890895					0	3.48884					AT5G06410	DNAJ heat shock N-terminal domain-containing protein
Bra019310	A03:25078619-25079177					47.9086	0					AT4G23340	"oxidoreductase, 2OG-Fe(II) oxygenase family protein"
Bra036394	A07:4384328-4384963					16.433	0					AT4G01370	"ATMPK4, MPK4; ATMPK4 (ARABIDOPSIS THALIANA MAP KINASE 4); MAP kinase/ kinase"
Bra002316	A10:10421264-10421900	68.2996	795.789	193.349	2832.21			31.5981	829.94			AT5G20630	"GLP3, GLP3A, GLP3B, ATGER3, GER3; GER3 (GERMIN 3); oxalate oxidase"
Bra038352	A02:10047776-10049749							0	17.9608			AT2G36580	"pyruvate kinase, putative"
Bra019313	A03:25066740-25070437							0	2.69534			AT4G23190	"CRK11, AT-RLK3; CRK11 (CYSTEINE-RICH RLK11); kinase/ protein kinase"
Bra034418	A05:13846799-13850938							0	4.20049			AT1G29720	protein kinase family protein
Bra038033	A06:14033-15771							0	8.90272			AT3G13040	myb family transcription factor
Bra025684	A06:6987801-6988347			0	9.16143			0	13.1611			AT2G27100	SE; SE (SERRATE); DNA binding / transcription factor
Bra036269	A09:954346-956193	0.112279	0.220049					0	5.98195			AT4G02410	lectin protein kinase family protein
Bra034183	A09:1073215-1361511	3694.43	4605.91					0	0.858455			AT4G03090	sequence-specific DNA binding / transcription factor
Bra034189	A09:1073215-1361511	6.68181	8.38118					0	0.858455			AT4G03140	binding / catalytic/ oxidoreductase
Bra034182	A09:1073215-1361511	6.55316	9.20424					0	0.858455			AT4G03070	AOP1, AOP, AOP1.1; AOP1; oxidoreductase, acting on paired donors, with incorporation or reduction of molecular oxygen, 2-oxoglutarate as one donor, and incorporation of one atom each of oxygen into both donors
Bra028292	A10:4692318-4693299							0	8.57716			AT3G11100	transcription factor
Bra023915	A01:20157162-20160530			10.277	0.236437			9.86758	0			AT1G74490	"protein kinase, putative"
Bra015746	A07:24334692-24338778	0.110486	0					1.69553	0			AT4G23160	protein kinase family protein
Bra003807	A07:18442662-18445750	3.74358	2.09787	109.233	65.7438			145.61	16.1024	263.918	28.0872	AT1G74310	"ATHSP101, HSP101, HOT1; ATHSP101 (ARABIDOPSIS THALIANA HEAT SHOCK PROTEIN 101); ATP binding / ATPase/ nucleoside-triphosphatase/ nucleotide binding / protein binding"
Bra036642	A09:6320197-6325864									133.889	15.2178	AT1G12520	ATCCS; ATCCS (COPPER CHAPERONE FOR SOD1); superoxide dismutase/ superoxide dismutase copper chaperone
Bra016205	A07:22149754-22166469									99.5911	11.5009	AT1G70530	protein kinase family protein
Bra016206	A07:22149754-22166469									99.5911	11.5009	AT1G70530	protein kinase family protein
Bra025082	A06:23984723-23986910									68.1577	353.818	AT5G23150	HUA2; HUA2 (ENHANCER OF AG-4 2); transcription factor
Bra036360	A02:21201331-21202815									10.9694	144.157	AT3G25890	"AP2 domain-containing transcription factor, putative"
Bra011747	A01:758417-760797	4.57104	2.09175					0.232843	0.540504	0	1.33617	AT4G37250	leucine-rich repeat family protein / protein kinase family protein
Bra022920	A03:7768292-7769612									0	12.9464	AT2G25450	"2-oxoglutarate-dependent dioxygenase, putative"
Bra005331	A05:4874757-4876335									0	2.0905	AT2G35540	DNAJ heat shock N-terminal domain-containing protein
Bra032251	A05:12444575-12444902									0	28.353	AT5G02800	protein kinase family protein
Bra025684	A06:6987801-6988347									0	12.4296	AT2G27100	SE; SE (SERRATE); DNA binding / transcription factor
Bra021073	A08:9243809-9248671									0	7.58156	AT4G34440	protein kinase family protein
Bra031149	A09:34038912-34041686									0	1.81044	AT1G33240	"AT-GTL1, AT-GTL2; AT-GTL1 (GT2-LIKE 1); DNA binding / transcription factor"
Bra015746	A07:24334692-24338778			0.432876	0					1.87652	0	AT4G23160	protein kinase family protein
Bra032800	A09:23869842-23876064			5.51799	0					5.09438	0	AT2G26430	cyclin-dependent protein kinase regulator
