# Supplementary material for: Comparative Transcriptome Analysis Reveals Heat-Responsive Genes in Chinese Cabbage (Brassica rapa ssp. chinensis)
Source: Front Plant Sci. 2016 Jun 28;7:939. doi: 10.3389/fpls.2016.00939 (PMC4923122; doi:10.3389/fpls.2016.00939)
Supplement: Table S5 — KEGG pathway of differentially expressed genes at different heat treatment stages. [file DataSheet5.XLSX]

## Sheet: Sheet1
Table S5 KEGG pathway of differentially expressed genes at different heat treatment stages.
ko00010	Glycolysis / Gluconeogenesis	Bra038352	Bra040933
ko00020	Citrate cycle (TCA cycle)	Bra007339
ko00030	Pentose phosphate pathway	Bra009764
ko00052	Galactose metabolism	Bra027397
ko00073	Cutin, suberine and wax biosynthesis	Bra027906	Bra034793
ko00100	Steroid biosynthesis	Bra029392
ko00130	Ubiquinone and other terpenoid-quinone biosynthesis	Bra018311
ko00195	Photosynthesis	Bra012057	Bra034200	Bra036240
ko00196	Photosynthesis - antenna proteins	Bra039070
ko00230	Purine metabolism	Bra038352	Bra040933	Bra002666
ko00250	Alanine, aspartate and glutamate metabolism	Bra001341	Bra023845	Bra028697
ko00260	Glycine, serine and threonine metabolism	Bra001341	Bra007213
ko00330	Arginine and proline metabolism	Bra028697
ko00360	Phenylalanine metabolism	Bra018311	Bra004273
ko00363	Bisphenol degradation	Bra011759	Bra035812	Bra010598	Bra000845
ko00380	Tryptophan metabolism	Bra011821	Bra020140	Bra020551	Bra020549
ko00400	Phenylalanine, tyrosine and tryptophan biosynthesis	Bra023651
ko00430	Taurine and hypotaurine metabolism	Bra024155
ko00440	Phosphonate and phosphinate metabolism	Bra034440
ko00460	Cyanoamino acid metabolism	Bra024155	Bra007510	Bra014510	Bra004833
ko00471	D-Glutamine and D-glutamate metabolism	Bra028697
ko00480	Glutathione metabolism	Bra025530	Bra012422	Bra024155	Bra039984	Bra026684
ko00500	Starch and sucrose metabolism	Bra007510	Bra014510	Bra014992	Bra027397	Bra004833
ko00520	Amino sugar and nucleotide sugar metabolism	Bra001453	Bra014992
ko00564	Glycerophospholipid metabolism	Bra034440
ko00590	Arachidonic acid metabolism	Bra024155
ko00592	alpha-Linolenic acid metabolism	Bra037198	Bra039120
ko00620	Pyruvate metabolism	Bra038352	Bra040933
ko00624	Polycyclic aromatic hydrocarbon degradation	Bra011759	Bra035812	Bra010598	Bra000845
ko00627	Aminobenzoate degradation	Bra011759	Bra035812	Bra010598	Bra000845
ko00630	Glyoxylate and dicarboxylate metabolism	Bra028181	Bra028174	Bra028175	Bra001843	Bra007339	Bra023487
ko00650	Butanoate metabolism	Bra023845
ko00680	Methane metabolism	Bra023487
ko00710	Carbon fixation in photosynthetic organisms	Bra028181	Bra028174	Bra028175
ko00770	Pantothenate and CoA biosynthesis	Bra007612
ko00902	Monoterpenoid biosynthesis	Bra038504
ko00903	Limonene and pinene degradation	Bra011759	Bra035812	Bra010598	Bra000845
ko00904	Diterpenoid biosynthesis	Bra036239
ko00906	Carotenoid biosynthesis	Bra018969
ko00909	Sesquiterpenoid and triterpenoid biosynthesis	Bra029392
ko00910	Nitrogen metabolism	Bra028697	Bra040520	Bra038302
ko00940	Phenylpropanoid biosynthesis	Bra010627	Bra018311	Bra007510	Bra014510	Bra004273	Bra004833
ko00941	Flavonoid biosynthesis	Bra018311	Bra004273
ko00945	Stilbenoid, diarylheptanoid and gingerol biosynthesis	Bra011759	Bra035812	Bra010598	Bra018311	Bra004273	Bra000845
ko00966	Glucosinolate biosynthesis	Bra011821
ko00970	Aminoacyl-tRNA biosynthesis	Bra023976
ko00980	Metabolism of xenobiotics by cytochrome P450	Bra025530	Bra012422	Bra039984	Bra026684
ko00982	Drug metabolism - cytochrome P450	Bra025530	Bra012422	Bra039984	Bra026684
ko01200	Carbon metabolism	Bra009764	Bra028181	Bra028174	Bra028175	Bra001843	Bra007339	Bra023487	Bra038352	Bra040933
ko01210	2-Oxocarboxylic acid metabolism	Bra011821	Bra007339
ko01220	Degradation of aromatic compounds	Bra018311
ko01230	Biosynthesis of amino acids	Bra007339	Bra023651	Bra038352	Bra040933
ko03008	Ribosome biogenesis in eukaryotes	Bra036236
ko03010	Ribosome	Bra039782	Bra037493	Bra032582	Bra007144	Bra022006
ko03013	RNA transport	Bra036099	Bra013787	Bra013294
ko03015	mRNA surveillance pathway	Bra036099	Bra013787	Bra007985	Bra013294
ko03018	RNA degradation	Bra036099	Bra013787	Bra013294
ko03030	DNA replication	Bra034395
ko03040	Spliceosome	Bra034104	Bra035944	Bra034208	Bra034187
ko03060	Protein export	Bra030036
ko03320	PPAR signaling pathway	Bra036230	Bra036231
ko03420	Nucleotide excision repair	Bra034395
ko03430	Mismatch repair	Bra034395
ko03440	Homologous recombination	Bra034395
ko03460	Fanconi anemia pathway	Bra034395
ko04010	MAPK signaling pathway	Bra034104	Bra036394
ko04012	ErbB signaling pathway	Bra036394
ko04013	MAPK signaling pathway - fly	Bra036394
ko04014	Ras signaling pathway	Bra036394
ko04015	Rap1 signaling pathway	Bra036394
ko04022	cGMP-PKG signaling pathway	Bra036394
ko04024	cAMP signaling pathway	Bra036394
ko04062	Chemokine signaling pathway	Bra036394
ko04064	NF-kappa B signaling pathway	Bra023915
ko04066	HIF-1 signaling pathway	Bra036394
ko04068	FoxO signaling pathway	Bra034154	Bra036394
ko04075	Plant hormone signal transduction	Bra034205	Bra034191	Bra039909	Bra013123
ko04112	Cell cycle - Caulobacter	Bra039001
ko04114	Oocyte meiosis	Bra036394
ko04115	p53 signaling pathway	Bra025434
ko04120	Ubiquitin mediated proteolysis	Bra025434
ko04130	SNARE interactions in vesicular transport	Bra034202
ko04141	Protein processing in endoplasmic reticulum	Bra008311	Bra003501	Bra034104	Bra030036	Bra034212
ko04144	Endocytosis	Bra034104	Bra029130
ko04145	Phagosome	Bra008412	Bra002260
ko04146	Peroxisome	Bra034154	Bra034793
ko04150	mTOR signaling pathway	Bra036394
ko04151	PI3K-Akt signaling pathway	Bra036394
ko04210	Apoptosis	Bra023915
ko04261	Adrenergic signaling in cardiomyocytes	Bra036394
ko04270	Vascular smooth muscle contraction	Bra036394
ko04310	Wnt signaling pathway	Bra025434
ko04320	Dorso-ventral axis formation	Bra036394
ko04350	TGF-beta signaling pathway	Bra036394
ko04360	Axon guidance	Bra037352	Bra036394
ko04370	VEGF signaling pathway	Bra036394
ko04380	Osteoclast differentiation	Bra036394
ko04510	Focal adhesion	Bra036394
ko04520	Adherens junction	Bra036394
ko04540	Gap junction	Bra008412	Bra036394	Bra002260
ko04550	Signaling pathways regulating pluripotency of stem cells	Bra036394
ko04611	Platelet activation	Bra036394
ko04612	Antigen processing and presentation	Bra034104
ko04620	Toll-like receptor signaling pathway	Bra023915	Bra036394
ko04621	NOD-like receptor signaling pathway	Bra036394
ko04626	Plant-pathogen interaction	Bra036234	Bra013123
ko04650	Natural killer cell mediated cytotoxicity	Bra036394
ko04660	T cell receptor signaling pathway	Bra036394
ko04662	B cell receptor signaling pathway	Bra036394
ko04664	Fc epsilon RI signaling pathway	Bra036394
ko04666	Fc gamma R-mediated phagocytosis	Bra037352	Bra036394
ko04668	TNF signaling pathway	Bra036394
ko04713	Circadian entrainment	Bra036394
ko04720	Long-term potentiation	Bra036394
ko04721	Synaptic vesicle cycle	Bra029130	Bra034202
ko04722	Neurotrophin signaling pathway	Bra023915	Bra036394
ko04723	Retrograde endocannabinoid signaling	Bra036394
ko04724	Glutamatergic synapse	Bra036394
ko04725	Cholinergic synapse	Bra036394
ko04726	Serotonergic synapse	Bra036394
ko04730	Long-term depression	Bra036394
ko04810	Regulation of actin cytoskeleton	Bra037352	Bra036394
ko04910	Insulin signaling pathway	Bra036394
ko04912	GnRH signaling pathway	Bra036394
ko04914	Progesterone-mediated oocyte maturation	Bra036394
ko04915	Estrogen signaling pathway	Bra034104	Bra036394
ko04916	Melanogenesis	Bra036394
ko04917	Prolactin signaling pathway	Bra036394
ko04919	Thyroid hormone signaling pathway	Bra036394
ko04921	Oxytocin signaling pathway	Bra036394
ko04930	Type II diabetes mellitus	Bra036394	Bra038352	Bra040933
ko04960	Aldosterone-regulated sodium reabsorption	Bra036394
ko04961	Endocrine and other factor-regulated calcium reabsorption	Bra029130
ko04964	Proximal tubule bicarbonate reclamation	Bra028697
ko05010	Alzheimer's disease	Bra036394
ko05014	Amyotrophic lateral sclerosis (ALS)	Bra036642
ko05016	Huntington's disease	Bra034154	Bra029130
ko05020	Prion diseases	Bra036394
ko05034	Alcoholism	Bra036394
ko05130	Pathogenic Escherichia coli infection	Bra008412	Bra002260
ko05131	Shigellosis	Bra036394
ko05132	Salmonella infection	Bra036394
ko05133	Pertussis	Bra023915	Bra037352	Bra036394
ko05134	Legionellosis	Bra034104	Bra023915	Bra036394
ko05142	Chagas disease (American trypanosomiasis)	Bra023915	Bra036394
ko05145	Toxoplasmosis	Bra034104	Bra023915	Bra036394
ko05152	Tuberculosis	Bra023915	Bra036394
ko05160	Hepatitis C	Bra036394
ko05161	Hepatitis B	Bra036394
ko05162	Measles	Bra034104	Bra023915
ko05164	Influenza A	Bra034104	Bra023915	Bra036394
ko05166	HTLV-I infection	Bra006751
ko05169	Epstein-Barr virus infection	Bra034104
ko05200	Pathways in cancer	Bra036394
ko05203	Viral carcinogenesis	Bra006751	Bra036394	Bra038352	Bra040933
ko05204	Chemical carcinogenesis	Bra025530	Bra012422	Bra039984	Bra026684
ko05205	Proteoglycans in cancer	Bra036394
ko05210	Colorectal cancer	Bra036394
ko05211	Renal cell carcinoma	Bra036394
ko05212	Pancreatic cancer	Bra036394
ko05213	Endometrial cancer	Bra036394
ko05214	Glioma	Bra036394
ko05215	Prostate cancer	Bra036394
ko05216	Thyroid cancer	Bra036394
ko05218	Melanoma	Bra036394
ko05219	Bladder cancer	Bra036394
ko05220	Chronic myeloid leukemia	Bra036394
ko05221	Acute myeloid leukemia	Bra036394
ko05222	Small cell lung cancer	Bra002666
ko05223	Non-small cell lung cancer	Bra036394	Bra002666
K00311	ETFDH	Bra004759
K01376	E3.4.22.-	Bra033148
K01802	E5.2.1.8	Bra023923
K03152	thiJ	Bra017622
K03232	EEF1B	Bra010682
K03671	trxA	Bra034214
K03695	clpB	Bra003807
K04082	hscB, HSCB, HSC20	Bra009192
K06174	ABCE1	Bra017243
K08145	SLC2A8, GLUT8	Bra002189
K08176	PHO84	Bra025850
K08235	E2.4.1.207	Bra034193
K08244	E2.7.9.4	Bra018156
K09286	EREBP	Bra037630
K09338	HD-ZIP	Bra018154
K10355	ACTF	Bra018480
K10999	cellulose synthase A	Bra029874
K11000	CALS	Bra034218	Bra034217
K11801	WDR23	Bra034178
K13207	CUGBP, BRUNOL, CELF	Bra034185
K14638	SLC15A3_4, PHT	Bra026201
K15032	MTERFD	Bra036228
K15378	SLC45A1_2_4	Bra026576
K15501	PPP6R3, SAPS3	Bra033843
K16900	TPC1, CCH1	Bra034219
